# 1 Integrative Proteomic Analysis of Posttranslational Modification 2 in The Inflammatory Response

3

4 Feiyang Ji<sup>1,#</sup>, Menghao Zhou<sup>1,#</sup>, Huihui Zhu<sup>2,#</sup>, Zhengyi Jiang<sup>1,#</sup>, Qirui Li<sup>1</sup>, Xiaoxi  
5 Ouyang<sup>1</sup>, Yiming Lv<sup>3</sup>, Sainan Zhang<sup>1</sup>, Tian Wu<sup>4</sup>, Lanjuan Li<sup>1,\*</sup>

6

7

## 8 **Institutions:**

9 <sup>1</sup>*State Key Laboratory for Diagnosis and Treatment of Infectious Diseases, National*

10 *Clinical Research Center for Infectious Diseases, Collaborative Innovation Center for*

11 *Diagnosis and Treatment of Infectious Diseases, The First Affiliated Hospital, College*

12 *of Medicine, Zhejiang University*

13 <sup>2</sup>*The First Affiliated Hospital, College of Medicine, Zhejiang University*

14 <sup>3</sup>*Department of Colorectal Surgery, Sir Run Run Shaw Hospital, College of Medicine,*

15 *Zhejiang University*

16 <sup>4</sup>*Quzhou Second People's Hospital*

## 17 **\*Corresponding author:**

18 Lanjuan Li, The First Affiliated Hospital, College of Medicine, Zhejiang University,

19 No.79 Qingchun Road, Shangcheng District, 310003 Hangzhou, Zhejiang Province,

20 China

21 **E-mail:** [ljli@zju.edu.cn](mailto:ljli@zju.edu.cn)

22

23 Words: 8317 words; References: 41; Figures: 8; Supplementary figures: 7;

24 Supplementary tables: 5; Title: 93 characters; Keywords: 5 words; Abstract: 114 words;

25

## 26 **Abstract**

27 The posttranslational modification (PTM) of proteins, particularly acetylation,  
28 phosphorylation and ubiquitination, plays a critical role in the host innate immune  
29 response. PTMs' dynamic changes and the crosstalk among them are complicated. To  
30 build a comprehensive dynamic network of inflammation related proteins, we  
31 integrated data from the whole cell proteome (WCP), acetylome, phosphoproteome and  
32 ubiquitinome of human and mouse macrophages. Our datasets of acetylation,  
33 phosphorylation and ubiquitination sites helped identify PTM crosstalk within and

34 across proteins involved in the inflammatory response. Stimulation of macrophages by  
35 lipopolysaccharide (LPS) resulted in both degradative and non-degradative  
36 ubiquitination. Moreover, this study contributes to the interpretation of the roles of  
37 known inflammatory molecules and the discovery of novel inflammatory proteins.  
38

39 **Keywords:** proteome; crosstalk; inflammation; LPS; macrophage

40

## 41 Introduction

42 Macrophages are resident phagocytic cells which act as effector cells in innate  
43 immune system and play a crucial role in initiating adaptive immunity by means of  
44 recruiting other immune cells [1]. Located throughout the tissues in the body,  
45 macrophages are among the first defensive cells to interact with foreign or abnormal  
46 host cells and their products. They are the most efficient phagocytes that can ingest and  
47 process foreign materials, dead cells and debris; they also release various secretory  
48 products to mobilize other host cells and influence other resident cells in the  
49 inflammatory response [2]. Posttranslational modifications (PTMs) have been reported  
50 to play a critical role in regulating multiple inflammatory signalling pathways.  
51 Phosphorylation, polyubiquitination, and acetylation exert a diversity of effects on  
52 pathogen recognition receptor (PRR)-dependent inflammatory responses [3].

53 Phosphorylation is a widely investigated type of PTM in innate immunity [4]. It  
54 is catalysed by protein kinases and reversed by protein phosphatases. The  
55 phosphorylation and dephosphorylation of certain proteins regulate the activation and  
56 deactivation of many TLR-dependent signalling molecules. Typical examples are  
57 *MAPKs*, *I $\kappa$ B $\alpha$* , *IKK $\alpha$* , *IKK $\beta$* , and *IRF3* [5]. Existing research also recognizes the critical  
58 role of the phosphorylation of innate immune adaptor proteins. For example, the  
59 phosphorylation of *MAVS*, *STING*, and *TRIF* is necessary for *IRF3*'s recruitment and  
60 type I *IFN*'s production, which is essential for the activation of antiviral immunity [6].  
61 Protein ubiquitination also plays a pivotal role in a wide variety of immunological  
62 processes [7]. Ubiquitin, a highly conserved polypeptide which comprises 76 amino  
63 acids, is attached to substrates by a complicated three-step enzymatic cascade [8].  
64 Seven lysine residues within ubiquitin can be bonded with poly-ubiquitin chains,  
65 namely, K6, K11, K27, K29, K33, K48, K63. Ubiquitin can also be ubiquitinated at the  
66 N-terminal methionine residue (M1) [3, 9]. Different types of ubiquitin connections  
67 lead to different outcomes. For example, K48-linked polyubiquitination of *I $\kappa$ B* results  
68 in its proteasomal degradation, promoting the nuclear translocation of *NF- $\kappa$ B* [10]. In  
69 contrast, K63-linked polyubiquitination of *TAB2/3*, *TRAF6*, *NEMO*, and *TRAF3* are  
70 "proteasome-independent" and requisite for activating *NF- $\kappa$ B* and *IRF3* [3].  
71 Furthermore, different linkage types of ubiquitin chains, such as M1, K11-, K48-, and  
72 K63-linked ubiquitin chains, are both involved in the TNF-induced inflammatory  
73 signalling pathway and play critical parts in the regulation of the downstream signalling  
74 cascade [8]. In addition to those two widespread PTMs, several studies have highlighted  
75 important roles for other PTMs, including acetylation, in the regulation of immune

76 responses. The change of chromatin structure via the acetylation of histones and its  
77 influence on gene transcription are well understood [11, 12]. For example, in antiviral  
78 immunity, *HDAC9* is upregulated and in turn deacetylates the kinase *TBK1* for  
79 activation, leading to increased *IFN* production [13]. Meanwhile, acetylation has been  
80 discovered in many non-histone substrates, which participate in immune system [14].

81 In the past few years, evidences for comprehensive crosstalk between PTMs has  
82 accumulated. An example of this crosstalk is the *NF- $\kappa$ B* signalling pathway, where  
83 *IKK $\beta$*  phosphorylates *I $\kappa$ B $\alpha$* , resulting in the K48-linked ubiquitination and degradation  
84 of *I $\kappa$ B $\alpha$* , the subsequent release of *NF- $\kappa$ B* and the entry of *p65* and *p50* dimers into the  
85 nucleus to activate target genes. As a matter of fact, some E3 ubiquitin ligases must be  
86 phosphorylated to become catalytically active or only ubiquitylate their substrates when  
87 the latter are phosphorylated [15]. According to a recent study by Huai et al, all three  
88 PTMs mentioned above occur in the same protein. In more detail, interferon regulatory  
89 factor 3 (*IRF3*) activity is strongly regulated by PTMs, such as ubiquitination and  
90 phosphorylation; however, *KAT8* inhibits antiviral immunity by acetylating *IRF3* [16].  
91 The combination of various PTMs on protein apparently creates a "PTM code" that is  
92 recognized by specific effectors to initiate or inhibit downstream events [17].

93 Although various studies have investigated the role of PTMs in innate immunity,  
94 few quantitative analyses of PTMs have been conducted in this area. Furthermore, the  
95 crosstalk between different PTMs is always a difficult subject to explore, as the PTMs  
96 usually occur too rapidly to measure. This study seeks to obtain data that will help  
97 address these research gaps. We selected two types of macrophages, Raw macrophages  
98 from mouse and Thp1 macrophages from human, to establish the model of the  
99 inflammatory response induced by LPS stimulation. We applied high-resolution mass  
100 spectrometry to discover and quantify the changes in the three types of PTMs during  
101 innate immune responses at different time points. Using the advanced stable isotope  
102 labelling with amino acids in cell culture (SILAC) technique, we successfully profiled  
103 all three modifications with high accuracy and precision [18]. We measured the changes  
104 in PTMs at 30 minutes and 2 hours after LPS stimulation, and then used the  
105 unsupervised clustering method to divide PTM events into different groups for  
106 subsequent analysis. The experimental analysis presented here represents one of the  
107 first investigations into PTM crosstalk during the innate immune response. Our findings  
108 could make an irreplaceable contribution to the field of novel changes in PTMs  
109 occurring during inflammation.

## 111 Results

### 112 The workflow of the integrative proteomics analysis of LPS-stimulated 113 macrophages

114 The transmission of signals from inflammatory signalling pathways involves the PTM  
115 of various proteins. We examined the changes in the acetylome, phosphoproteome and  
116 ubiquitinome in two types of inflammatory cells (Raw and Thp1) at different time  
117 points after LPS stimulation to investigate the relationship between the PTMs of various  
118 proteins during this process. We performed quantitative profiling of acetylation sites

119 using Ac-Lys proteomics. Ac-Lys peptides result from tryptic cleavage of an acetylated  
120 lysine substrate and can be enriched with an Ac-Lys antibody. TiO<sub>2</sub>, Fe-NTA and P-Tyr  
121 methods were used to quantify the changes in the phosphoproteome. TiO<sub>2</sub> and Fe-NTA  
122 are complementary methods to enrich phosphorylation sites in serine, threonine and  
123 tyrosine substrates. In contrast, a P-Tyr antibody specifically enriches phosphorylation  
124 sites in tyrosine substrates. We also performed quantitative profiling of ubiquitination  
125 sites using K-ε-GG proteomics. K-ε-GG remnants are a result of tryptic cleavage of a  
126 ubiquitinated lysine substrate and are enriched by a K-ε-GG antibody. We applied  
127 SILAC for the relative quantification of PTM sites, and all experiments were performed  
128 in three biological replicates. In addition, we increased the number of identified proteins  
129 and PTM sites using fractionation methods (**Figure 1**). After comparing the three  
130 phosphorylation omics methods, approximately one-third to half of the phosphorylation  
131 sites were quantified using both TiO<sub>2</sub> and Fe-NTA methods. Meanwhile, most of the  
132 phosphorylation sites quantified using P-Tyr method were different from the sites  
133 identified with the other two methods (Figure S1A). The effects of MG132 on the  
134 identification of protein and ubiquitination sites were compared, and MG132 had little  
135 effect on the identification of proteins in the whole cell proteome (WCP), but exerted a  
136 relatively significant effect on the identification of ubiquitination sites in the  
137 ubiquitinome (Figure S1B).

### 138 **High-confidence integrative proteomics analysis of LPS-stimulated macrophages**

139 We analyzed the overlap of proteins identified by three types of PTM omics and WCP  
140 to determine whether the target proteins of different PTMs differed. As shown in **Figure**  
141 **2A**, approximately half of the proteins identified using WCP did not contain any PTM  
142 sites (2554 proteins in Raw cells and 2952 proteins in Thp1 cells). In contrast, 384  
143 proteins in Raw cells and 306 proteins in Thp1 cells carried all three types of PTMs.  
144 The table shown in **Figure 2B** provides an overview of the proteins and PTM sites  
145 quantified in our study. We quantified 6333 proteins in Raw cells and 6431 proteins in  
146 Thp1 cells, 2450 acetylation sites in 1284 proteins in Raw cells and 2183 acetylation  
147 sites in 1089 proteins in Thp1 cells, 17,034 phosphorylation sites in 4955 proteins in  
148 Raw cells and 18,018 phosphorylation sites in 5162 proteins in Thp1 cells and 7836  
149 ubiquitination sites in 2898 proteins in Raw cells and 7326 ubiquitination sites in 2735  
150 proteins in Thp1 cells (Table S1). The UpSet plots shown in **Figures 2C** and S1C were  
151 used to visualize the overlap between PTM sites and proteins in 3 repeated experiments  
152 in a matrix layout, allowing us to easily validate the repeatability of the experiments.  
153 Pearson's correlation coefficients for pair-wise comparisons of the log<sub>2</sub> M/L  
154 abundances were up to 0.96 in Raw cells and 0.88 in Thp1 cells (**Figures 2D** and S1D).  
155 Based on these results, our experiments displayed a reliable reproducibility between  
156 biological samples.

### 157 **Properties and differences among different types of PTM proteomics**

158 The abundance of different types of PTM on the same protein differed. As shown in  
159 **Figure 3A**, phosphorylated proteins usually contained more than one phosphorylation  
160 site (61% in Raw cells and 60% in Thp1 cells). The percentage of multiple PTM sites  
161 in phosphorylated proteins was higher than in acetylated (39% in Raw cells and 40%  
162 in Thp1 cells) and ubiquitinated proteins (55% in Raw cells and 55% in Thp1 cells).

163 We defined the PTM sites with an average 2-fold change (up or down) in three  
164 biological duplicates during LPS stimulation as regulated PTM sites. Specifically,  
165 approximately 1500 proteins in Raw cells and approximately 700 proteins in Thp1 cells  
166 only contained one regulated PTM sites, accounting for larger proportion than other  
167 groups (**Figure 3B**). Furthermore, no proteins contained more than two regulated  
168 acetylation sites (Figure S2A). Meanwhile, the analysis of the dynamic changes in  
169 PTMs is one of interesting part of our research. According to the changes in PTM sites  
170 observed in 0.5 hours and 2 hours, we classified the regulated PTM sites into six clusters  
171 using the fuzzy c-means method. First, we divided the regulated PTM sites according  
172 to the speed at which changes occurred: PTM sites that did not change in 0.5 hours were  
173 included in the slow-change group, while the PTM sites that changed were the fast-  
174 change group. Then, we divided the fast-change group into lasting and transient groups  
175 according to persistence of the change in 2 hours. Finally, we separated the groups into  
176 upregulated and downregulated groups, resulting in six clusters. The trends of changes  
177 in PTMs are displayed in line charts (**Figures 3C** and S2B). The proportions of "slow"  
178 and "fast" items varied in different PTM types (**Figures 3D** and S2C). We defined the  
179 proteins with a 2-fold change (up or down) in the PTM sites during LPS stimulation as  
180 regulated proteins. Besides, proteins were classified as single-regulated and multi-  
181 regulated groups according to the number of regulated PTM sites. In this study, the term  
182 "synchrony" was used to refer to regulated proteins in which the regulated PTM sites  
183 were in the same slow or fast group mentioned above. In contrast, the term  
184 "heterochrony" was used to describe the PTMs of certain proteins that occurred at  
185 different speeds. **Figure 3E** provides the summary statistics for proteins classified using  
186 our standard. Using the Raw cells as an example, a large proportion (67.4%) of the  
187 proteins detected did not contain any regulated PTM sites, while approximately 19.3%  
188 of proteins contained a single regulated PTM site. Of the 13.3% proteins containing  
189 multiple regulated PTM sites, 41% of them were synchronous, and 59% were  
190 heterochronous. Moreover, 13% and 22% of the synchronous proteins and  
191 heterochronous proteins contained multi-type of PTM.

### 192 **PTM crosstalk within and across proteins**

193 The density gradient plots shown below illustrate the overall distribution of changes in  
194 PTMs. More upregulated PTM sites were identified than downregulated sites in all  
195 types of PTMs in both cell lines (**Figures 4A** and S3A). Further, the heatmap of  
196 regulated proteins with the three types of PTM and WCP is shown in **Figures 4B** and  
197 S3B. We performed an iceLogo analysis to visualize the conserved patterns of protein  
198 sequence difference between regulated and unregulated PTM sites (**Figures 4C** and  
199 S3C). With the help of the STRING database, we also visualized the comprehensive  
200 protein-protein interactions between the regulated proteins (**Figures 4D** and S3D; Table  
201 S2). PTM Crosstalk across proteins was based on the assumption that if there is an  
202 interaction between two proteins, there is a higher probability that the PTM sites on  
203 these two proteins existed crosstalk, especially, when this PTM sites were both  
204 regulated in a biological process. Phosphorylation and acetylation mainly targeted  
205 proteins related to chromatin assembly and mRNA processing, while ubiquitination  
206 mainly targeted proteins related to protein stability (Figure S4). Most of the proteins we

207 identified interacted with other proteins to some extent, indicating the complicated  
208 crosstalk among PTMs from different proteins. As shown in the violin plot presented  
209 in **Figure 5A**, the average sequence distance of PTM sites in synchronous proteins was  
210 closer than in the unregulated proteins. Here, we further divided the sequence distance  
211 of PTM sites in heterochronous proteins into two clusters: one only measures the  
212 distance between the synchronous PTM sites, while the other only measures the  
213 distance between heterochronous PTM sites. The average sequence distances of PTM  
214 sites in the two heterochronous groups were much farther than in unregulated proteins  
215 and synchronous proteins, and the sequence distance of the synchrony cluster of  
216 heterochronous proteins was farther than heterochrony cluster. After counting the  
217 numbers of interacting proteins in each group mentioned in Figure 3E, the numbers of  
218 interacting proteins in descending order was heterochronous proteins, synchronous  
219 proteins, single regulated proteins, and unregulated proteins (**Figure 5B**; Table S3).  
220 Additionally, the numbers of total PTM sites in proteins followed the same order as the  
221 numbers of interacting proteins (**Figure 5C**). The M/L values of PTM sites in  
222 unregulated proteins, single regulated proteins, synchronous proteins and  
223 heterochronous proteins was undifferentiated (Figure S5A). We drew a table to present  
224 the relationships of different PTMs from the “fast” and “slow” groups. Most of the “fast”  
225 type of acetylation sites was more likely to coexist with the “slow” type of  
226 phosphorylation sites and acetylation sites, while most of the “fast” type of  
227 ubiquitination sites was grouped with the “slow” type of phosphorylation sites and  
228 ubiquitination sites. A striking observation from the values presented in this table is that  
229 the counts for the intersection of “fast” and “slow” type of phosphorylation sites were  
230 particularly large (**Figure 5D**). Those propensities of PTM sites between “fast” and  
231 “slow” groups have examples in the immune response. In the *TLR4* pathway, proteins  
232 such as *MAP2K4*, *MAP3K20*, *NFKB2*, *TAB3* and *NFKBIE* contained both “fast”  
233 phosphorylation sites and “slow” phosphorylation sites. Moreover, *MAPK6* possessed  
234 both a “fast” ubiquitination site and a “slow” ubiquitination site, while *TAB2* contained  
235 both a “fast” phosphorylation site and a “slow” ubiquitination site (**Figures 5E** and  
236 S5B).

### 237 **LPS induces both degradative and non-degradative ubiquitination**

238 Ubiquitylation usually results in two distinct outcomes: degradative and non-  
239 degradative processes. We integrated WCP and ubiquitinome datasets acquired from  
240 cells treated with or without MG132 to clearly distinguish the results of ubiquitination  
241 after LPS stimulation. We first investigated whether the number of proteins would be  
242 influenced by the level of mRNA. The levels of several inflammatory cytokines, namely,  
243 *IL-1*, *IL-16*, *IL-18*, *TGFBI* and *TNF*, which should increase after LPS stimulation, did  
244 not change in both Raw and Thp1 cells after 0.5 hours of stimulation (**Figure 6A**).  
245 Meanwhile, real-time qPCR revealed that the mRNA levels of the proteins whose levels  
246 were significantly regulated in our WCP datasets did not increase (**Figure 6B**). Together,  
247 the level of mRNA had little effect on the quantity of proteins at 0.5 hours after LPS  
248 stimulation. The relative abundance of ubiquitin lysine sites indicated that the  
249 ubiquitination of K48 (usually results in degradation) dominated, followed by the  
250 ubiquitination of K63 (usually does not result in degradation) (**Figure 6C**). Additionally,

251 the ubiquitination of K48 and K63 was relatively stable during LPS stimulation (Figure  
252 S6A). A closer inspection of the ubiquitinome and WCP revealed that some  
253 ubiquitination sites (4% in Raw cells and 3% in Thp1 cells) and proteins (1% in both  
254 Raw and Thp1 cells) in LPS-stimulated macrophages dramatically affected by MG132  
255 (**Figures 6D** and S6B). We next predicted the outcomes of ubiquitination proteins  
256 according to the hypothesis that changes in ubiquitination are inversely proportional to  
257 changes in the levels of proteins for degradative ubiquitination (**Figure 6E**). Notably,  
258 non-degradative ubiquitination was widespread after LPS stimulation, including  
259 *NFKB1*, *MAPK1*, *TRAF1* and other proteins (**Figure 6F**). Notably, MG132 modulated  
260 LPS-induced inflammation (Figure S6C).

### 261 **New proteins and PTMs involved in inflammatory responses**

262 We integrated the WCP, acetylome, phosphoproteome, and ubiquitinome datasets to  
263 construct a network of PTM patterns for regulated proteins in the *MAPK* and *NFKB*  
264 signalling pathways and to illuminate the PTMs of proteins in major inflammatory  
265 signalling pathways that are activated by LPS stimulation. We mapped protein,  
266 acetylation, phosphorylation and ubiquitination level ratios at different times in this  
267 network. Twenty-two proteins (*IRAK2*, *IRF3*, *TAB2*, *TAB3*, *TBK1*, *TRIF*, *MAPK9*,  
268 *MAPK11*, *MAPK12*, *MAP2K3*, *MAP2K4*, *MAP2K7*, *MAPKAPK2*, *MNK2*, *MSK1*,  
269 *MSK2*, *C-Rel*, *NFKB1*, *NFKB2*, *NFKBIE*, *NFKBID*, and *NFKBIZ*) in this network  
270 exhibited upregulated phosphorylation sites, while four proteins (*TAB3*, *MAP2K7*,  
271 *MSK2*, and *NFKBIZ*) in this network displayed downregulated phosphorylation sites.  
272 Besides, some of these proteins contained more than one regulated phosphorylation  
273 sites, for example, *TAB3* contained seven regulated phosphorylation sites but only  
274 phosphorylation in S60 been well studied. Interestingly, *TAB3* and *MAP2K7* contained  
275 both upregulated and downregulated phosphorylation sites. Acetylation and  
276 ubiquitination of proteins in this network were generally unregulated, except the  
277 acetylation of K310 in *RelA*. Nevertheless, two proteins (*MYD88* and *MAPKAPK2*)  
278 contained low levels of regulated ( $\log_2$  ratio  $\geq 0.5$  or  $\leq -0.5$ ) ubiquitination sites (**Figure**  
279 **7A**). Regulated PTM sites widely existed in several protein families (*CASPASE* family,  
280 *MAPK* family, *MAP2K* family, *MAP3K* family, interferon related family, *NLRP* family,  
281 *TRAF* family, and *RIPK* family) associated with inflammation in both Raw and Thp1  
282 cells (**Figures 7B** and S7). All the PTM data obtained in this study were visualized in a  
283 PTM-inflammation website (**Figure 8A**). To help identify new proteins that involved  
284 in the inflammatory response, we filtered 95 proteins that contained significantly  
285 regulated PTM sites but lacked studies on inflammation. We further screened these  
286 proteins using corresponding siRNAs, and the results are displayed in **Figure 8B** and  
287 Table S4. Homology comparison of regulated proteins identified in Raw264.7 and Thp1  
288 cells revealed that the post-translational modifications of 91 proteins were conserved  
289 between humans and mice (Table S5).

290

## 291 **Discussion**

292 Previous studies have reported LPS-induced proteomics or phosphoproteomics data in  
293 Raw264.7 and Thp1 cells [19, 20]. However, these studies focused on functional

294 analysis of differential proteins and the type of post-translational modification was  
295 primarily phosphorylation. In this study, we integrated WCP, acetylome,  
296 phosphoproteome and ubiquitinome datasets to identify LPS stimulation-dependent  
297 PTM events in macrophages. These data also provided insights into the crosstalk  
298 between PTMs during the inflammatory response. Although we didn't validate the PTM  
299 data by biochemical approaches, our results were consistent with previous findings,  
300 such as the phosphorylation on Y182 of *P38 $\beta$* , the phosphorylation on Y185 of *P38 $\gamma$*   
301 and the phosphorylation on S18 of *NFKBIE* (Figure 7A). Besides, we performed siRNA  
302 experiments in mouse PM. As expected, the inflammatory response was affected by  
303 reducing the proteins whose PTMs were significantly altered in cell lines.

304 Among those datasets, phosphorylation had a significant advantage in terms of the  
305 number of quantified sites. For all PTMs in both types of macrophages, except  
306 phosphorylation in Raw cells, the proportion of upregulated sites exceeded the  
307 proportion of downregulated sites, and the proportion of upregulated sites increased  
308 while the proportion of downregulated sites decreased as the period of LPS stimulation  
309 increased. We believe that the faster reaction rate of phosphorylation leads to the  
310 different trend of phosphorylation in Raw cells. Additionally, the PTM properties of  
311 different cells were slightly different, and different PTMs usually occurred in the  
312 proteins of distinct functional groups. However, the WCP showed obvious randomness  
313 in functional groups, suggesting that the LPS-induced signal transduction was less  
314 dependent on the changes in protein levels.

315 The time series analysis has increasingly been applied to proteomics [21, 22]. In  
316 our study, a large number of proteins contained at least one type of regulated PTM.  
317 Within one protein, crosstalk events usually occur among nearby PTM sites, so the  
318 sequence distances between crosstalk pairs are shorter than average [23]. Therefore, the  
319 regulated PTM sites in proteins that only contain synchronously regulated PTM sites  
320 are more likely to be involved in crosstalk due to their shorter sequence distance than  
321 unregulated PTM sites. However, the sequence distance for both synchronously and  
322 heterochronously regulated PTM sites in proteins that contain heterochronously  
323 regulated PTM sites was farther than unregulated PTM sites. Additionally, more  
324 interacting partners was observed for proteins containing heterochronously regulated  
325 PTM sites than proteins only containing synchronously regulated PTM sites. Overall,  
326 we concluded that the regulated PTM sites in proteins containing heterochronously  
327 regulated PTM sites are more likely to have crosstalk with PTM sites in the  
328 corresponding interacting proteins. It can thus be suggested that the PTM sites  
329 participating in crosstalk between proteins have farther sequence distance because they  
330 tend to be located in different domains in a protein. Interestingly, the number of PTM sites  
331 was proportional to the number of interacting proteins.

332 MG132, which inhibits the degradation of ubiquitinated protein, has been widely  
333 used to study the molecular mechanism of inflammation [24-26]. However, MG132  
334 could directly influence the ubiquitination of certain proteins or indirectly influence  
335 ubiquitination by inhibiting the inflammatory response of macrophages. Thus, it is  
336 difficult to distinguish degradative and non-degradative ubiquitination by comparing  
337 the outcomes in cells treated with or without MG132. Therefore, we proposed a more



338 reliable method to determine the levels of degradative and non-degradative  
339 ubiquitination according to whether the changes in protein levels were consistent with  
340 the changes in ubiquitination levels after the addition of MG132. Using this technique,  
341 we discovered both degradative and non-degradative ubiquitination are prevalent in the  
342 immune response to LPS stimulation. The premise of this method is to limit the reaction  
343 time, so that the effect of gene expression on protein levels can be ignored.  
344 Complementarily, the integrated analysis of ubiquitinome, WCP and transcriptome data  
345 solves this problem when the effect of gene expression on protein level is unable to be  
346 ignored [27]. Although these methods eliminate the negative effects of MG132, a  
347 specific inhibitor of deubiquitination for a specific protein is preferred.

348 In conclusion, this study provides high-quality datasets of multiple PTMs to serve  
349 as a resource for screening new molecules involved in the inflammatory response. The  
350 identified PTM sites in the known inflammation-related proteins could help to discover  
351 the underlying molecular mechanisms in inflammatory response. Importantly, our in-  
352 depth analyses have identified the interrelationships among the most common PTMs  
353 and pave the way for future studies aiming to determine the relationships among other  
354 PTMs.

355

## 356 **Materials and methods**

### 357 **Reagents**

358 MG-132 (Selleck, Cat# S2619, Houston, USA), PR-619 (Selleck, Cat# S7130, Houston,  
359 USA), trypsin (Beierli, Cat# BELT001), PTMScan ubiquitin remnant motif kit (Cell  
360 Signaling Technology, Cat# 5562, Bossdun, USA), PTMScan acetyl-lysine motif kit  
361 (Cell Signaling Technology, Cat# 13416, Bossdun, USA), PTMScan phospho-tyrosine  
362 rabbit mAb kit (Cell Signaling Technology, Cat# 8803, Bossdun, USA), high-select Fe-  
363 NTA phosphopeptide enrichment kit (ThermoFisher, Cat# A32992, Waltham, USA),  
364 high-select TiO<sub>2</sub> phosphopeptide enrichment kit (ThermoFisher, Cat# A32993,  
365 Waltham, USA), protease and phosphatase inhibitor cocktail (Beyotime, Cat# P1049),  
366 DMEM for SILAC (Gibco, Cat# 88364), dialyzed fetal bovine serum (Gibco, Cat#  
367 30067334), L-lysine-<sup>13</sup>C<sub>6</sub>-<sup>15</sup>N<sub>2</sub> (Gibco, Cat# 88209), L-arginine-<sup>13</sup>C<sub>6</sub>-<sup>15</sup>N<sub>4</sub> (Gibco, Cat#  
368 89990), L-lysine-4,4,5,5-D<sub>4</sub> (Gibco, Cat# 88438), L-arginine-<sup>13</sup>C<sub>6</sub> (Gibco, Cat# 88433),  
369 and RPMI 1640 medium for SILAC (Gibco, Cat# 88365).

### 370 **Cell culture and sample preparation**

371 Raw264.7 and Thp1 cells were cultured in DMEM or RPMI 1640 medium without  
372 lysine and arginine but excess L-proline. Cells grown in light media (supplemented  
373 with 100 mg/L L-lysine and 100 mg/L L-arginine), medium media (supplemented with  
374 100 mg/L L-lysine-4,4,5,5-D<sub>4</sub> and 100 mg/L L-arginine-<sup>13</sup>C<sub>6</sub>) and heavy media  
375 (supplemented with 100 mg/L L-lysine-<sup>13</sup>C<sub>6</sub>-<sup>15</sup>N<sub>2</sub> and 100 mg/L L-arginine-<sup>13</sup>C<sub>6</sub>-<sup>15</sup>N<sub>4</sub>)  
376 were activated with 100 ng/mL LPS for 0, 0.5 and 2 hours, respectively. Before the  
377 follow-up experiments, we detected the SILAC experiments with a labeling efficiency  
378 of over 98%. For the MG132 experiments, all SILAC-labelled cells were treated with  
379 5 μM MG132 for 2 hours. A 10-cm dish of Cells were harvested for each experiment  
380 and lysed with freshly prepared lysis buffer (8 M urea, 150 mM NaCl, 50 mM Tris-HCl

381 (pH 8.0), 1X phosphorylase inhibitor, 1X EDTA, 50  $\mu$ M PR-619, and 1x protease  
382 inhibitor). Protein concentrations were estimated using the BCA kit and lysates from  
383 each cell line treated with light, medium and heavy media were combined in a 1:1:1  
384 ratio. The combined lysates were reduced with 10 mM dithiothreitol (DTT),  
385 carbamidomethylated with 30 mM iodoacetamide (IAA) and digested overnight with  
386 trypsin. Peptides were acidified with trifluoroacetic acid (TFA), desalted with  
387 preconditioned C18 Sep-Pak SPE cartridges and lyophilized for 48 hours with a  
388 vacuum lyophilizer (LABCONCO, Kansas, USA). Peritoneal macrophages were  
389 acquired from 6-8-week-old male C57/BL6 mice. This study was approved by the  
390 ethics committees of the First Affiliated Hospital of Zhejiang University.

### 391 **Enrichment of ubiquitinated, acetylated and phosphorylated peptides**

392 For proteomics analyses of acetylation, p-Tyr and ubiquitination, lyophilized peptides  
393 were resuspended in cold 1 $\times$  IAP buffer and incubated with corresponding cross-linked  
394 antibody beads for 2 hours at 4°C with end-over-end rotation. Beads were softly washed  
395 three times with ice-cold 1 $\times$  IAP buffer and twice with ice-cold MS water. Modified  
396 peptides were eluted twice by adding 50  $\mu$ l of 0.15% TFA. For TiO<sub>2</sub> and Fe-NTA  
397 proteomics, lyophilized peptides were treated using the methods described in the  
398 protocols provided with the corresponding kits. The enriched peptides were quickly  
399 dried by vacuum centrifugation and divided into eight fractions using high pH reversed-  
400 phase chromatography (HPRP). All peptides were desalted using homemade stage tip  
401 chromatography and dried by vacuum centrifugation prior to the MS analysis.

### 402 **LC-MS/MS Analysis**

403 All peptide samples were resuspended in 2% acetonitrile (ACN) and 0.1% formic acid  
404 (FA). Then, peptides were separated by nanoLC-MS/MS using an UltiMate 3000  
405 RSLCnano system (ThermoFisher, Waltham, USA) and analysed using Q Exactive HF-  
406 X (ThermoFisher, Waltham, USA). Gradient elution was performed at 32°C over 120  
407 minutes using a gradient of 3–80% ACN in 0.1% FA. The MS spectra of WCP,  
408 ubiquitinome, TiO<sub>2</sub> and Fe-NTA samples were acquired at a resolution of 120,000 with  
409 a mass range of 300–1500 m/z and an AGC target of 3E6, while acetylome and p-Tyr  
410 spectra were acquired at a resolution of 60,000. MS2 spectra were acquired at a  
411 resolution of 30,000, and HCD fragmentation was performed with a collision energy of  
412 approximately 27% NCE. The isolation window was set to 1.0 m/z and the dynamic  
413 exclusion window was set to 30 s.

### 414 **Identification and quantification of the proteome**

415 MaxQuant (version 1.6.2.10) was used for protein identification and quantification. The  
416 human and mouse UniProtKB databases were utilized as the search databases. The  
417 variable modifications of the acetylome, phosphoproteome and ubiquitinome included  
418 oxidation (M), acetyl (protein N-term), and corresponding PTMs. Carbamidomethyl (C)  
419 was set as the fixed modification. The maximum number of modifications for a peptide  
420 was set to 5. Trypsin was set as the digestion enzyme, and the maximum value of missed  
421 cleavage sites was 2. Additionally, we used 20 ppm as the ion tolerance in the first  
422 search and 4.5 ppm as the ion tolerance in the main search. Both peptide and protein  
423 identification were performed at an FDR < 1%. The default parameters of MaxQuant  
424 were adopted if not described above.

## 425 **Real-time qPCR and siRNA screening experiment**

426 Raw cells were treated with 100 ng/mL LPS, and RNA was isolated using the RNA  
427 extraction kit (Feijie) according to the manufacturer's protocol. The cDNA templates  
428 were synthesized using the RNA reverse transcription kit (Takara, Tokyo, Japan).  
429 Quantitative PCR was performed using TB Green® Premix Ex Taq™ II (Takara, Tokyo,  
430 Japan). The siRNA was purchased from Dharmacon and transfected into Raw and PM  
431 cells using the DharmaFECT 1 siRNA Transfection Reagent.

## 432 **Functional Annotation Enrichment Analysis**

433 Proteins containing PTM sites with a fold change  $\geq 2$  were selected for functional  
434 annotation enrichment analysis using WebGestalt 2019 to identify the pathways in  
435 which different PTMs were enriched in cells stimulated with LPS based on the  
436 proteomics data [28]. We chose the top three categories of the forty categories  
437 visualized in the report for each cell and time point. The heat map was constructed using  
438 the pheatmap package in R software.

## 439 **The PTM consensus motifs**

440 We analysed sequences within -15 to +15 amino acids of the quantified PTM sites (the  
441 PTM site was located at position 0) to explore the consensus sequence of amino acids  
442 surrounding each PTM. IceLogo was used to generate the amino acid sequence diagram  
443 [29].

## 444 **Statistical analysis**

445 The R framework (version 3.5.1) and GraphPad Prism (version 7) software were used  
446 to perform all statistical analyses of the bioinformatics data. All the proteomics datasets  
447 were performed in biological triplicates. The real-time qPCR analysis of mRNA  
448 abundance was performed in biological triplicates. The siRNA screening experiment  
449 was performed using biological duplicates. The table listing PTM sites was filtered to  
450 remove entries with a localization probability less than 90%. The PTM sites with a  
451 membership greater than 0.6 were classified into the corresponding category using the  
452 fuzzy c-means method. The interaction network only retained the interactions with a  
453 STRING database score greater than 0.8.

## 454 **Data availability**

455 The mass spectrometry proteomics data have been deposited to the ProteomeXchange  
456 Consortium (<http://proteomecentral.proteomexchange.org>) via the iProX partner  
457 repository [30] with the dataset identifier PXD015527. PTM-inflammation website  
458 (<http://ptm-inflammation.cn>) is freely accessible. All other data supporting our findings  
459 are available in the article and supplemental information.

460

## 461 **Authors' contributions**

462 FY.J, HH.Z, MH.Z and ZY.J performed the majority of experiments. FY.J, YM.L and  
463 MH.Z performed the majority of data and statistical analysis. FY.J, HH.Z and MH.Z  
464 conceived and designed experiments. FY.J, MH.Z, YM.L and QR.L wrote and edited  
465 the manuscript. LJ.L directed the study. XX.OY, SN.Z and T.W assisted with  
466 experiments.

467

## 468 **Competing interests**

469 The authors have declared no competing interests.  
470

## 471 **Acknowledgements**

472 We thank zeyu sun and Jing Jiang for mass spectrometry technical support. We thank  
473 Danhua Zhu, Xiaopeng Yu and Yanhong Zhan for helpful discussions. This work was  
474 supported by the National Key Research and Development Program of China  
475 (2016YFC1101304/3), the National Key Research and Development Program  
476 (2017YFC1200100), the National Natural Science Foundation of China (81400589),  
477 Chinese national science and technology major project of the 13th Five-year  
478 plan(2017ZX10202202-001-008), and Science Fund for Creative Research Groups of  
479 the National Natural Science Foundation of China (81721091).  
480

## 481 **Authors' ORCID IDs**

482 0000-0002-0710-0739 (Ji, Feiyang); 0000-0002-4243-7783 (Zhou, Menghao); 0000-  
483 0002-4541-9695 (Zhu, Huihui); 0000-0003-1700-8394 (Jiang, Zhengyi); 0000-0002-  
484 9347-5448 (Li, Qirui); 0000-0002-5045-5260 (Ouyang, Xiaoxi); 0000-0003-4835-  
485 0336 (Lv, Yiming); 0000-0001-7258-4592 (Zhang, Sainan); 0000-0002-5374-1836  
486 (Wu, Tian); 0000-0001-6945-0593 (Li, Lanjuan);  
487

## 488 **References**

- 489 [1] Geissmann F, Manz MG, Jung S, Sieweke MH, Merad M, Ley K. Development of monocytes,  
490 macrophages, and dendritic cells. *Science* 2010;327:656-61.
- 491 [2] Murray PJ, Wynn TA. Protective and pathogenic functions of macrophage subsets. *Nature reviews*  
492 *immunology* 2011;11:723.
- 493 [3] Liu J, Qian C, Cao X. Post-translational modification control of innate immunity. *Immunity*  
494 2016;45:15-30.
- 495 [4] Karin M, Ben-Neriah Y. Phosphorylation meets ubiquitination: the control of NF- $\kappa$ B activity. *Annual*  
496 *review of immunology* 2000;18:621-63.
- 497 [5] Arthur JSC, Ley SC. Mitogen-activated protein kinases in innate immunity. *Nature Reviews*  
498 *Immunology* 2013;13:679.
- 499 [6] Liu S, Cai X, Wu J, Cong Q, Chen X, Li T, et al. Phosphorylation of innate immune adaptor proteins  
500 MAVS, STING, and TRIF induces IRF3 activation. *Science* 2015;347:aaa2630.
- 501 [7] Jiang X, Chen ZJ. The role of ubiquitylation in immune defence and pathogen evasion. *Nature*  
502 *Reviews Immunology* 2012;12:35.
- 503 [8] Ikeda F. Linear ubiquitination signals in adaptive immune responses. *Immunological reviews*  
504 2015;266:222-36.
- 505 [9] Komander D, Rape M. The ubiquitin code. *Annual review of biochemistry* 2012;81:203-29.
- 506 [10] Skaug B, Jiang X, Chen ZJ. The role of ubiquitin in NF- $\kappa$ B regulatory pathways. *Annual review of*  
507 *biochemistry* 2009;78:769-96.

- 508 [11] Haberland M, Montgomery RL, Olson EN. The many roles of histone deacetylases in development  
509 and physiology: implications for disease and therapy. *Nature Reviews Genetics* 2009;10:32.
- 510 [12] Kanno Y, Vahedi G, Hirahara K, Singleton K, O'Shea JJ. Transcriptional and epigenetic control of  
511 T helper cell specification: molecular mechanisms underlying commitment and plasticity. *Annual review*  
512 *of immunology* 2012;30:707-31.
- 513 [13] Li X, Zhang Q, Ding Y, Liu Y, Zhao D, Zhao K, et al. Methyltransferase Dnmt3a upregulates  
514 HDAC9 to deacetylate the kinase TBK1 for activation of antiviral innate immunity. *Nature immunology*  
515 2016;17:806.
- 516 [14] Mowen KA, David M. Unconventional post-translational modifications in immunological signaling.  
517 *Nature immunology* 2014;15:512.
- 518 [15] Cohen P. Immune diseases caused by mutations in kinases and components of the ubiquitin system.  
519 *Nature immunology* 2014;15:521.
- 520 [16] Huai W, Liu X, Wang C, Zhang Y, Chen X, Chen X, et al. KAT8 selectively inhibits antiviral  
521 immunity by acetylating IRF3. *Journal of Experimental Medicine* 2019;216:772-85.
- 522 [17] Venne AS, Kollipara L, Zahedi RP. The next level of complexity: crosstalk of posttranslational  
523 modifications. *Proteomics* 2014;14:513-24.
- 524 [18] Ong S-E, Blagoev B, Kratchmarova I, Kristensen DB, Steen H, Pandey A, et al. Stable isotope  
525 labeling by amino acids in cell culture, SILAC, as a simple and accurate approach to expression  
526 proteomics. *Molecular & cellular proteomics* 2002;1:376-86.
- 527 [19] Luo Y, Jiang Q, Zhu Z, Sattar H, Wu J, Huang W, et al. Phosphoproteomics and Proteomics Reveal  
528 Metabolism as a Key Node in LPS-Induced Acute Inflammation in RAW264.7. *Inflammation* 2020.
- 529 [20] Meijer K, Weening D, de Vries MP, Priebe MG, Vonk RJ, Roelofsen H. Quantitative proteomics  
530 analyses of activation states of human THP-1 macrophages. *J Proteomics* 2015;128:164-72.
- 531 [21] Walther DM, Kasturi P, Zheng M, Pinkert S, Vecchi G, Ciryam P, et al. Widespread Proteome  
532 Remodeling and Aggregation in Aging *C. elegans*. *Cell* 2015;161:919-32.
- 533 [22] Weinert BT, Narita T, Satpathy S, Srinivasan B, Hansen BK, Scholz C, et al. Time-Resolved Analysis  
534 Reveals Rapid Dynamics and Broad Scope of the CBP/p300 Acetylome. *Cell* 2018;174:231-44 e12.
- 535 [23] Liu HF, Liu R. Structure-based prediction of post-translational modification cross-talk within  
536 proteins using complementary residue- and residue pair-based features. *Brief Bioinform* 2019.
- 537 [24] Yin Q, Han T, Fang B, Zhang G, Zhang C, Roberts ER, et al. K27-linked ubiquitination of BRAF  
538 by ITCH engages cytokine response to maintain MEK-ERK signaling. *Nat Commun* 2019;10:1870.
- 539 [25] Annibaldi A, Wicky John S, Vanden Berghe T, Swatek KN, Ruan J, Liccardi G, et al. Ubiquitin-  
540 Mediated Regulation of RIPK1 Kinase Activity Independent of IKK and MK2. *Molecular Cell*  
541 2018;69:566-80.e5.
- 542 [26] Ohtake F, Saeki Y, Ishido S, Kanno J, Tanaka K. The K48-K63 Branched Ubiquitin Chain Regulates  
543 NF- $\kappa$ B Signaling. *Molecular Cell* 2016;64:251-66.
- 544 [27] Dybas JM, O'Leary CE, Ding H, Spruce LA, Seeholzer SH, Oliver PM. Integrative proteomics  
545 reveals an increase in non-degradative ubiquitylation in activated CD4(+) T cells. *Nat Immunol*  
546 2019;20:747-55.
- 547 [28] Liao Y, Wang J, Jaehnig EJ, Shi Z, Zhang B. WebGestalt 2019: gene set analysis toolkit with  
548 revamped UIs and APIs. *Nucleic Acids Res* 2019;47:W199-W205.
- 549 [29] Colaert N, Helsens K, Martens L, Vandekerckhove J, Gevaert K. Improved visualization of protein  
550 consensus sequences by iceLogo. *Nat Methods* 2009;6:786-7.
- 551 [30] Ma J, Chen T, Wu S, Yang C, Bai M, Shu K, et al. iProX: an integrated proteome resource. *Nucleic*

- 552 Acids Res 2018.
- 553 [31] FLEMING Y, ARMSTRONG CG, MORRICE N, PATERSON A, GOEDERT M, COHEN P.  
554 Synergistic activation of stress-activated protein kinase 1/c-Jun N-terminal kinase (SAPK1/JNK)  
555 isoforms by mitogen-activated protein kinase kinase 4 (MKK4) and MKK7. *Biochemical Society*  
556 2000;352:145–54.
- 557 [32] Fox T, Fitzgibbon MJ, Fleming MA, Hsiao H-M, Brummel CL, Su MS-S. Kinetic mechanism and  
558 ATP-binding site reactivity of p38Q MAP kinase. *FEBS Letters* 1999;461:323-8.
- 559 [33] Tomas-Zuber M, Mary JL, Lesslauer W. Control sites of ribosomal S6 kinase B and persistent  
560 activation through tumor necrosis factor. *J Biol Chem* 2000;275:23549-58.
- 561 [34] Karpova AY, Trost M, Murray JM, Cantley LC, Howley PM. Interferon regulatory factor-3 is an in  
562 vivo target of DNA-PK. *PNAS* 2002;99:2818–23.
- 563 [35] Mahlknecht U, Will J, Varin A, Hoelzer D, Herbein G. Histone deacetylase 3, a class I histone  
564 deacetylase, suppresses MAPK11-mediated activating transcription factor-2 activation and represses  
565 TNF gene expression. *J Immunol* 2004;173:3979-90.
- 566 [36] Wang JT, Doong SL, Teng SC, Lee CP, Tsai CH, Chen MR. Epstein-Barr virus BGLF4 kinase  
567 suppresses the interferon regulatory factor 3 signaling pathway. *J Virol* 2009;83:1856-69.
- 568 [37] Moore TC, Petro TM. IRF3 and ERK MAP-kinases control nitric oxide production from  
569 macrophages in response to poly-I:C. *FEBS Letters* 2013;587:3014–20.
- 570 [38] Lee BC, Miyata M, Lim JH, Li JD. Deubiquitinase CYLD acts as a negative regulator for bacterium  
571 NTHi-induced inflammation by suppressing K63-linked ubiquitination of MyD88. *Proc Natl Acad Sci*  
572 *U S A* 2016;113:E165-71.
- 573 [39] Zhang Q, Lenardo MJ, Baltimore D. 30 Years of NF-kappaB: A Blossoming of Relevance to Human  
574 Pathobiology. *Cell* 2017;168:37-57.
- 575 [40] Thapa D, Nichols C, Bassi R, Martin ED, Verma S, Conte MR, et al. TAB1-Induced Autoactivation  
576 of p38 $\alpha$  Mitogen-Activated Protein Kinase Is Crucially Dependent on Threonine 185. *Molecular and*  
577 *Cellular Biology* 2018;38.
- 578 [41] Zhao Y, Mudge MC, Soll JM, Rodrigues RB, Byrum AK, Schwarzkopf EA, et al. OTUD4 Is a  
579 Phospho-Activated K63 Deubiquitinase that Regulates MyD88-Dependent Signaling. *Mol Cell*  
580 2018;69:505-16 e5.
- 581

## 582 **Figure legends**

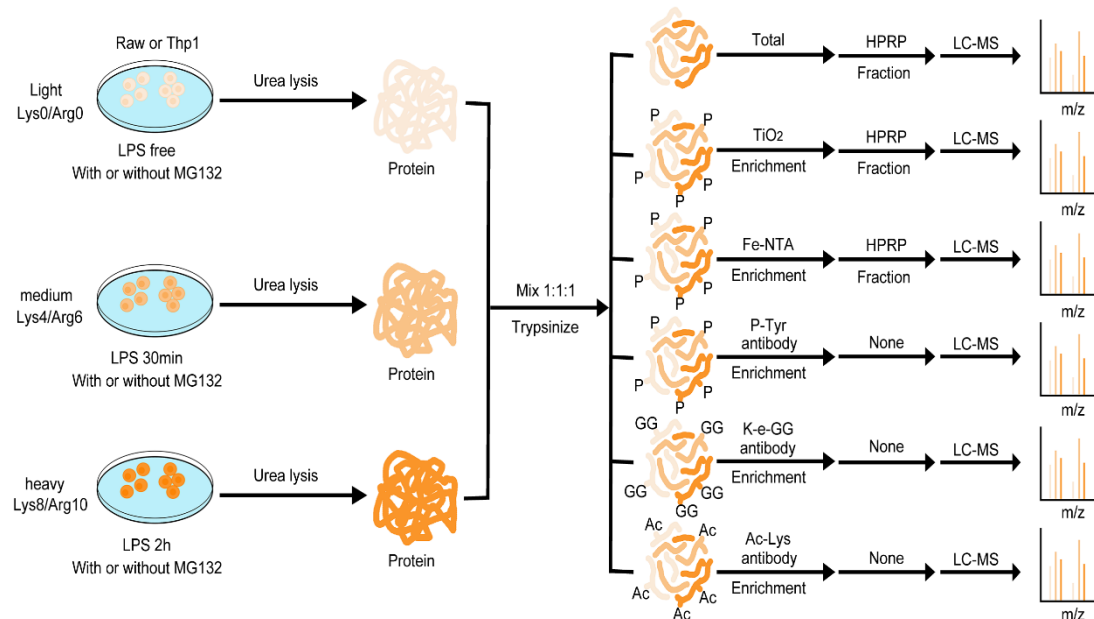

583

### 584 **Figure 1 Integrative proteomics analysis of macrophages stimulated with LPS**

585 Schematic of the integrated proteomics workflow: Raw and Thp1 cells cultivated in  
586 light, medium or heavy “SILAC, stable isotope labelling with amino acids in cell  
587 culture” medium was stimulated with “LPS, lipopolysaccharide” at different time  
588 points the presence or absence of MG132. Thp1 cells were deal with 20 ng/mL “PMA,  
589 Phorbol 12-myristate 13-acetate“ for 16 hours before LPS stimulation. The ‘rested’ and  
590 ‘stimulated’ cells were then prepared for “WCP, whole cell proteome”, “P,  
591 phosphoproteome”, “Ac, acetylome” and “Ub, ubiquitinome” analyses. The different  
592 color of cell, protein and peptide represent light, medium and heavy SILAC label.

593 Abbreviation: “HPRP, High pH reversed-phase chromatography”; “LC-MS, Liquid  
594 chromatography-tandem mass spectrometry”;

595

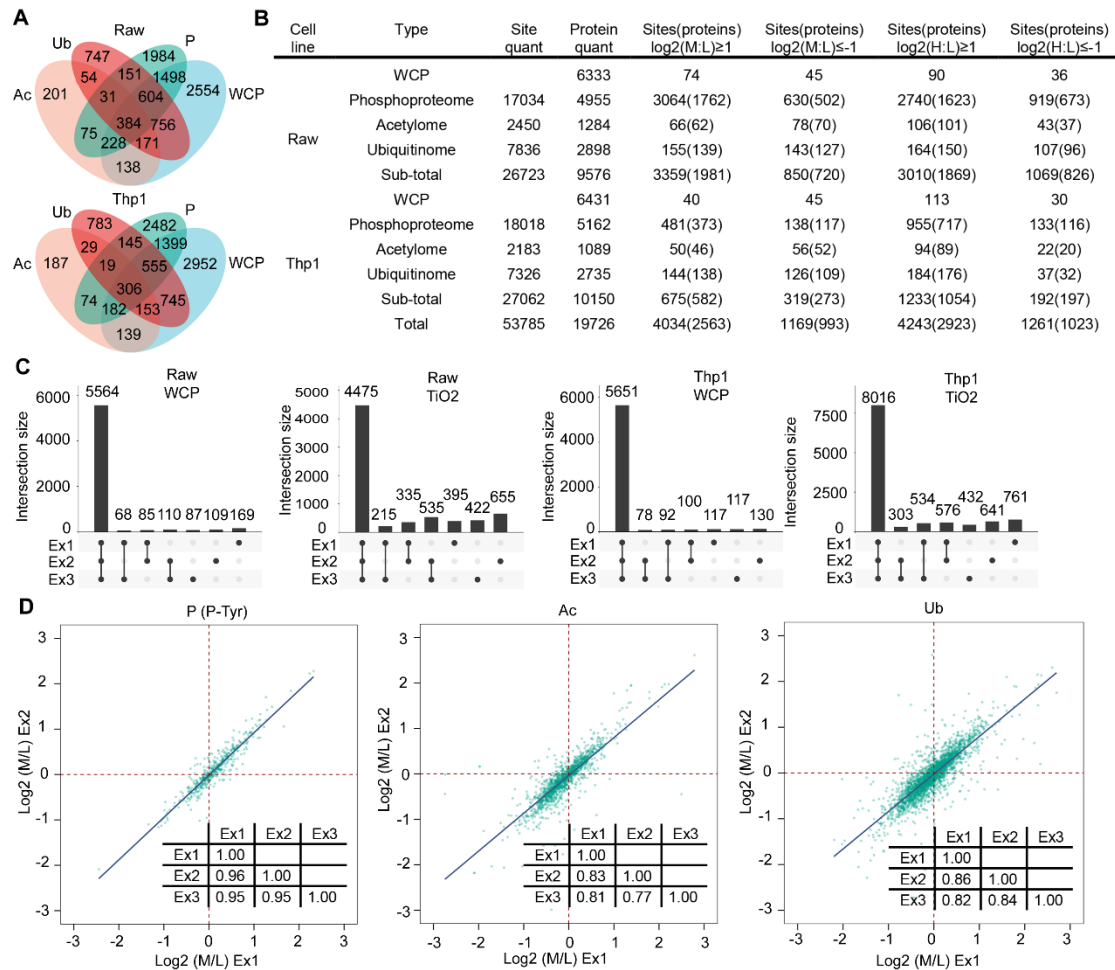

596

597 **Figure 2 A high-confidence map of integrative proteomics data from LPS-**  
 598 **stimulated macrophages**

599 (A) Venn diagrams of proteins quantified in the WCP or sites of corresponding proteins  
 600 quantified in “PTM, posttranslational modification” proteomics.

601 (B) Sites and proteins quantified in PTM proteomics and WCP from the two cell types  
 602 are shown.

603 (C) Number of proteins and sites that are quantified in each of 1, 2 or 3 WCP and TiO2  
 604 experiments in the two cell types.

605 (D) Pearson’s correlation plots for two representative experiments (Ex) analysing P-  
 606 Tyr, Ac and Ub in Raw cells. The inserted table shows Pearson’s correlation coefficients  
 607 for all three biological duplicates.

608



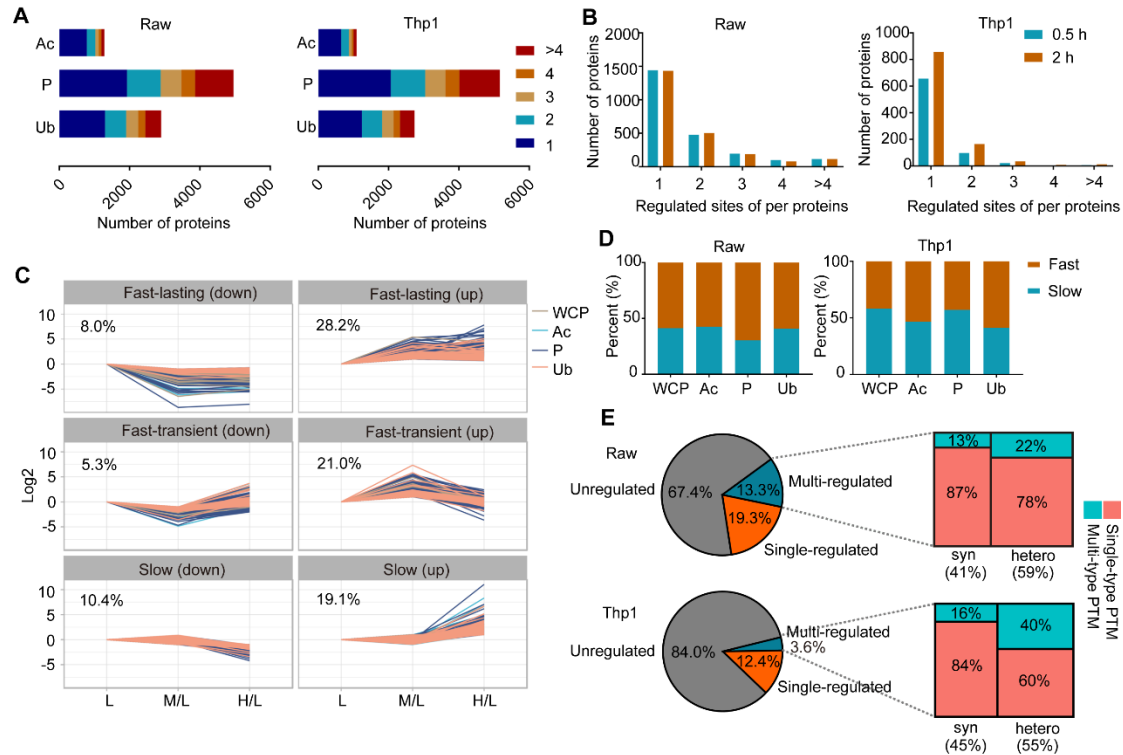

609

610 **Figure 3 Properties and differences among various types of PTM proteomics**

611 (A) Distribution of the number of quantified sites detected in the identical protein in

612 Raw and Thp1 cells.

613 (B) Distribution of all regulated PTM sites per protein in macrophages stimulated with

614 LPS for 0.5 and 2 hours.

615 (C) Changes in integrative proteomics data in LPS treated Raw cells over time.

616 Regulated proteins and PTM sites were clustered into the six indicated categories using

617 the fuzzy c-means method.

618 (D) The distribution of categories of regulated proteins and PTM sites from the

619 integrative proteomics analysis. The six categories in C were combined into two

620 categories according to the speed of change.

621 (E) Proteins were classified as unregulated, single-regulated, and multi-regulated

622 groups according to the number of regulated PTM sites. The multi-regulated proteins

623 were classified as “syn, synchronous” and “hetero, heterochronous”, depending on

624 whether all the regulated sites had the same classification in D.

625

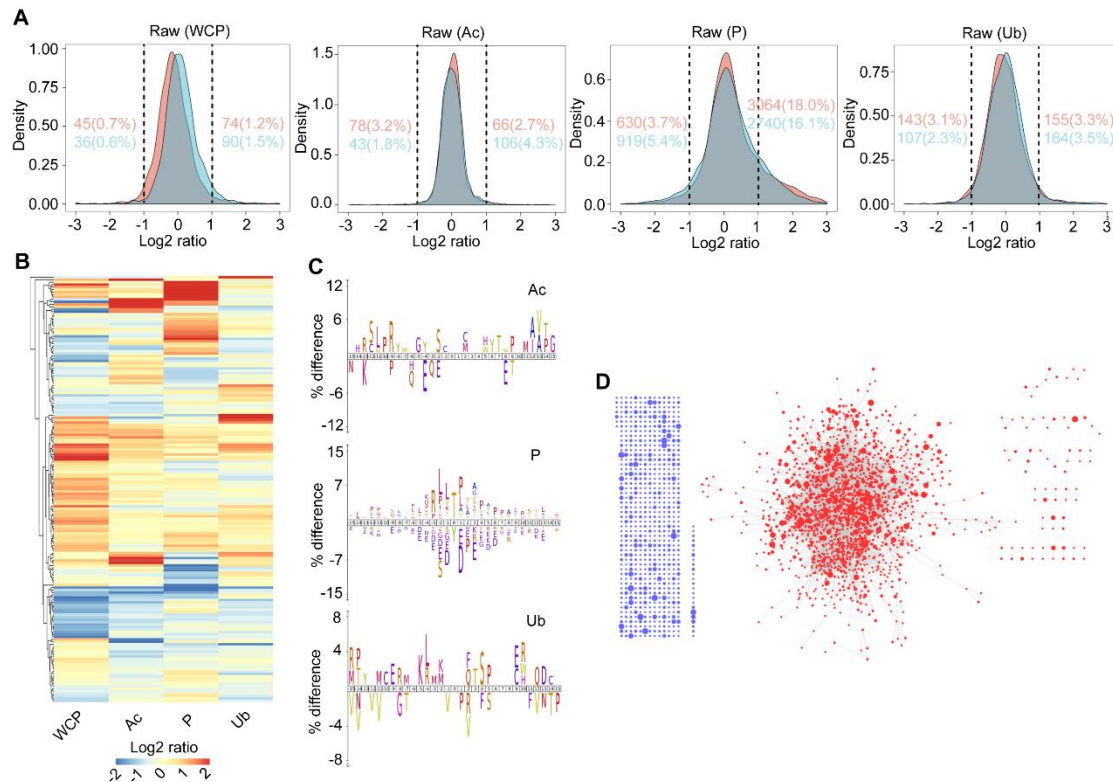

626

627

**Figure 4 Crosstalk between PTM sites on the different proteins**

628

(A) Density gradient diagram of the Log<sub>2</sub> ratio of proteins and PTM sites in the different proteomes of Raw cells. Carmine and cyan represent 0.5 hours and 2 hours after LPS stimulation, respectively. Carmine and cyan numbers on the left and right represent the number and percentage of regulated proteins and PTM sites in the two time points, respectively.

633

(B) Heatmap representation of the Log<sub>2</sub> (M/L) abundance of proteins quantified in both the WCP and all PTM proteomics in Raw cells. Only proteins with a Log<sub>2</sub> (M/L) value  $\geq 1$  or  $\leq -1$  are shown, and the colour of proteins in PTM proteomics indicate the mean Log<sub>2</sub> (M/L) ratio of all PTM sites in the protein.

636

(C) The iceLogo plots show the difference of amino acid frequency at positions flanking the PTM sites for LPS-regulated PTM sites compared to unregulated PTM sites with a p value  $\leq 0.05$  in Raw cells.

640

(D) Interaction network for proteins with regulated PTM sites in Raw cells. Blue dots indicate the proteins with no interacting partner, while red dots indicate the proteins interacting with other proteins. The size of the dot indicates the number of regulated PTM sites.

644

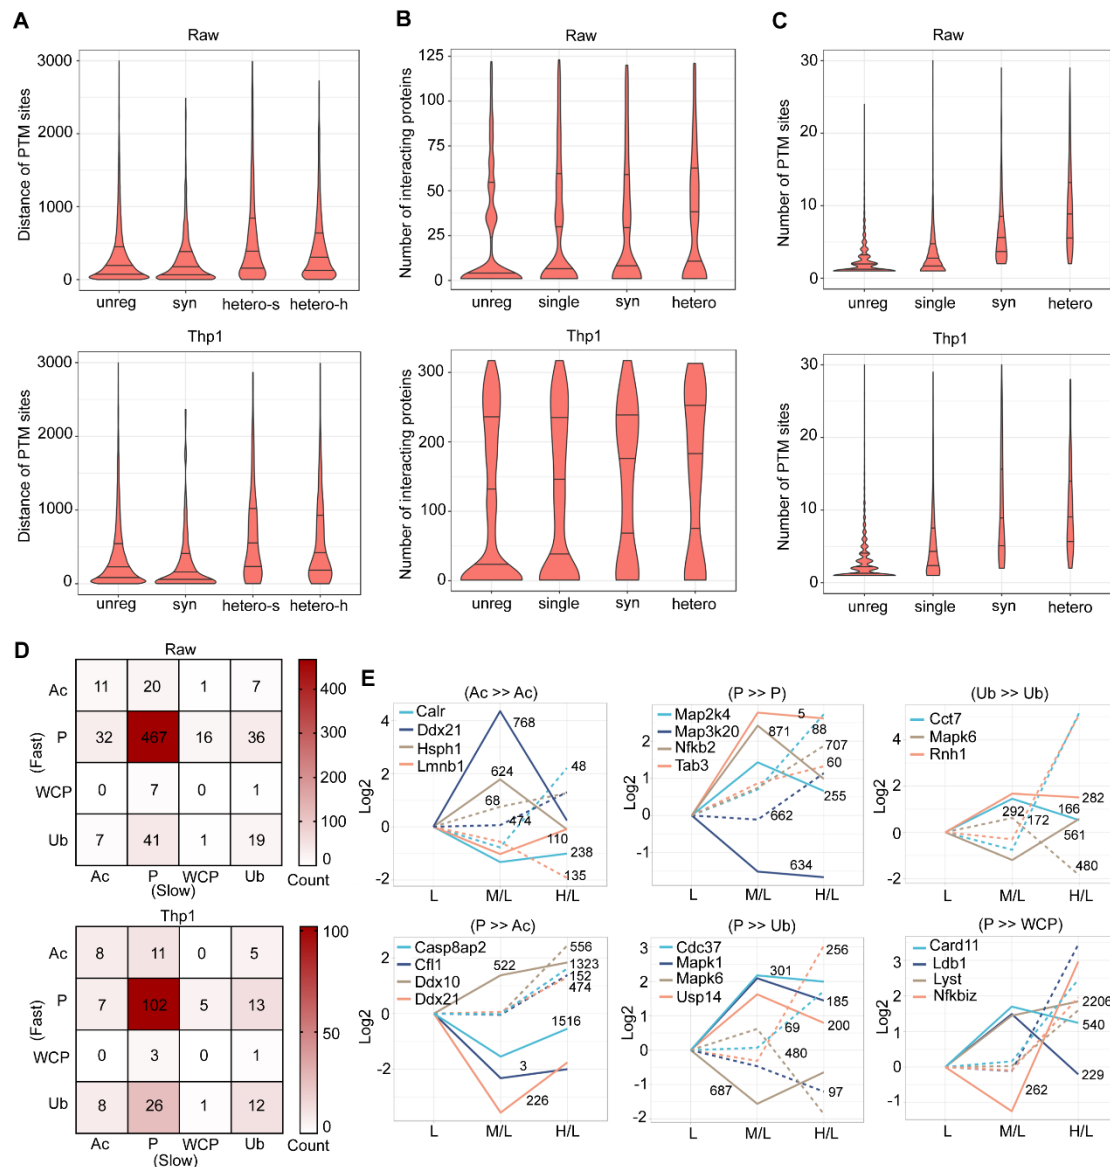

645

646

**Figure 5 Crosstalk between multiple PTM sites on the same protein**

647 (A) Distribution of the sequence distance between different PTM sites for proteins in  
 648 the “unreg, unregulated”, syn, “hetero-s, the syn sites in hetero proteins” and “hetero-  
 649 h, the hetero sites in hetero proteins” groups.

650 (B) Distribution of the number of interacting proteins for proteins in the unreg, “single,  
 651 single-regulated”, syn and hetero groups. The number of interacting proteins was  
 652 acquired from IntAct.

653 (C) Distribution of the number of identified PTM sites for proteins in the unreg, single,  
 654 syn and hetero groups.

655 (D) Heatmap indicating all relationships between different PTM types and the WCP.

656 (E) Selected proteins in Raw cells belonging to the important combination types listed  
 657 in D. The solid line represents a ‘fast’ regulated event and the dotted line represents a  
 658 ‘slow’ regulated event. The number next to the line represents the site of PTM on the  
 659 corresponding protein. The PTM in the left of “>>” is ‘slow’ PTM and The PTM in the  
 660 right of “>>” is ‘fast’ PTM.

661 For A, B and C, the lower, median and upper lines in each violin plot correspond to

662 25%, 50% and 75%, respectively.

663

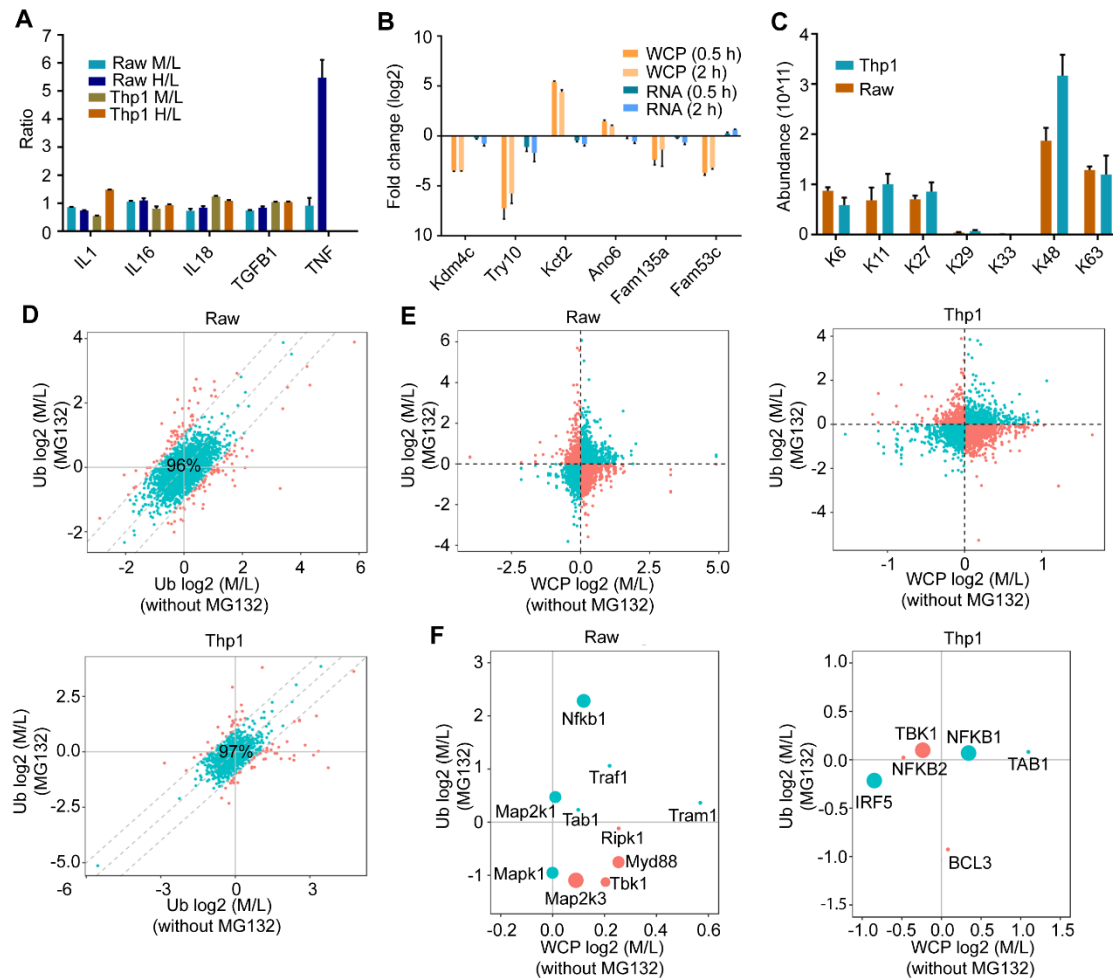

664

665 **Figure 6 Degradative and non-degradative ubiquitination both exist in the LPS-**  
 666 **stimulated ubiquitinome**

667 (A) WCP protein ratios for selected inflammatory factors from three biological  
 668 replicates are shown.

669 (B) The levels of proteins and RNAs (Fold changes related to 0 h) for selected genes in  
 670 Raw cells with LPS stimulation from three biological replicates are shown.

671 (C) Abundance of ubiquitin lysine sites quantified in the Ub of LPS-stimulated  
 672 macrophages.

673 (D) Comparison of Log<sub>2</sub> (M/L) value of the ubiquitination site abundance from the  
 674 LPS-stimulated Ub of cells treated with or without MG132 for 2 hours. Sites that  
 675 exhibited a  $\geq 1$  Log<sub>2</sub> (M/L) difference in untreated and MG132-treated cells were  
 676 considered dramatically affected by MG132 (carmine).

677 (E) Comparison of Log<sub>2</sub> (M/L) values in the WCP of cells treated without MG132 and  
 678 the Ub of cells treated with MG132. Sites showing the same changes in the two types  
 679 of omics data listed above are predicted to be non-degradative ubiquitinated sites (cyan),  
 680 while the remaining sites are degradative ubiquitinated sites (carmine).

681 (F) Proteins in the TLR4 pathway are used to illustrate the classification in E.

682 For A, B and C, error bars represent the standard error of the mean.

683

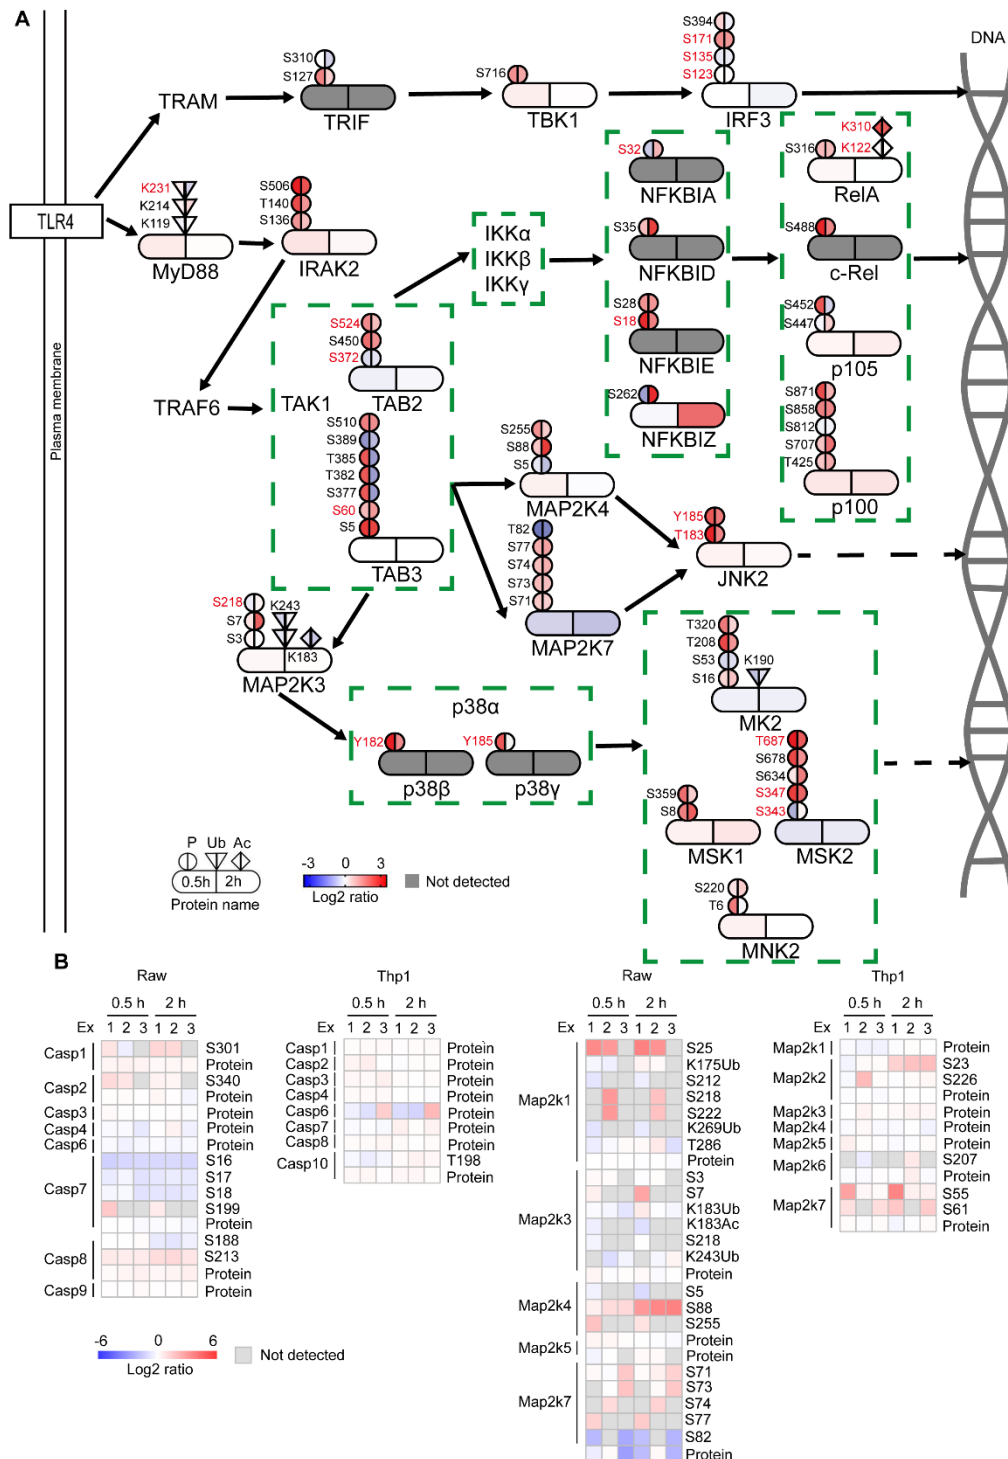

684

685 **Figure 7 New PTMs in TLR4 signaling pathway involved in inflammatory**  
 686 **responses**

687 (A) Regulated proteins within the *TLR4* pathway are grouped by function, and arrows  
 688 indicate the direction of signal transduction. The colours on the left and right represent  
 689 Log<sub>2</sub> ratios of the indicated proteomics datasets from cells stimulated with LPS for 0.5  
 690 hours and 2 hours, respectively. PTM sites with known functions based on UniProt and  
 691 previous articles are coloured in red [31-41].

692 **(B)** Heatmap representation of the intensity of proteins and PTM sites involved in  
693 inflammatory signalling pathways detected in cells stimulated with LPS for 0.5 hours  
694 and 2 hours.  
695

A

Basic information for **Map2k3**

|                      |                                                                                                                                                                                                                              |
|----------------------|------------------------------------------------------------------------------------------------------------------------------------------------------------------------------------------------------------------------------|
| Uniprot ID           | Q09110                                                                                                                                                                                                                       |
| Symbol Name          | Map2k3                                                                                                                                                                                                                       |
| Organism             | mouse                                                                                                                                                                                                                        |
| Mass (Da)            | 39296                                                                                                                                                                                                                        |
| Length (aa)          | 347                                                                                                                                                                                                                          |
| Subcellular Location | unknow                                                                                                                                                                                                                       |
| Modification Type    | unknow                                                                                                                                                                                                                       |
| Uniprot Description  | Dual specificity kinase. Is activated by cytokines and environmental stress in vivo. Catalyzes the concomitant phosphorylation of a threonine and a tyrosine residue in the MAP kinase p38. Par... <a href="#">Show more</a> |
| Sequence             | MESPAASPASLPQTKGKSKRKKDLRISCVSKPPVSNPTPPRNLDLRSRTFITIGDRNFEVEADDLVTISELGRG... <a href="#">Show more</a>                                                                                                                      |

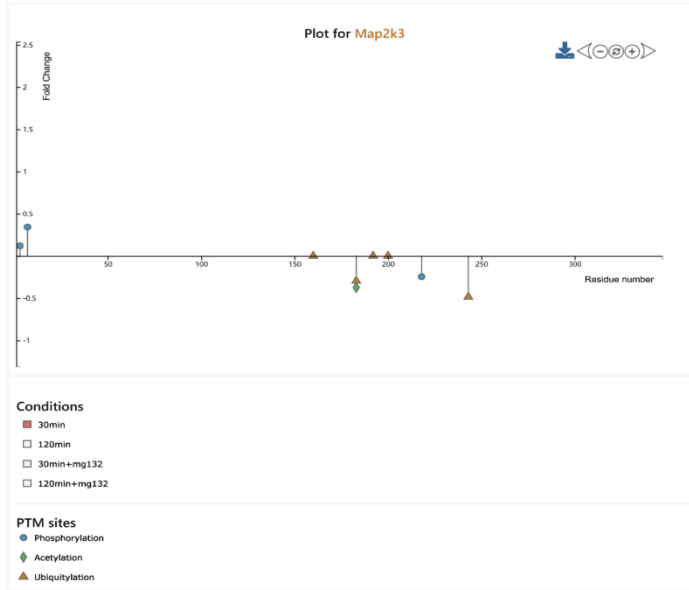

Detail table

| Position | Type            | Flanking Sequen... | 30min  | 120min | 30min+mg132 | 120min+mg... |
|----------|-----------------|--------------------|--------|--------|-------------|--------------|
| S3       | PHOSPHORYLAT... | ___MEsPAAS...      | 0.121  | 0.015  | 0.000       | 0.000        |
| S7       | PHOSPHORYLAT... | _MESPAAsPPAS...    | 0.343  | 2.116  | 0.000       | 0.000        |
| K160     | UBIQUITYLATI... | KVLEKNMkIPED...    | 0.000  | 0.000  | -0.370      | 0.182        |
| K183     | ACETYLATION     | ALEHLHSkLSVI...    | -0.374 | -0.732 | 0.000       | 0.000        |
| K183     | UBIQUITYLATI... | ALEHLHSkLSVI...    | -0.295 | 0.117  | -0.413      | -0.079       |
| K192     | UBIQUITYLATI... | SVIHRDVkPSNV...    | 0.000  | 0.000  | -1.094      | -0.233       |
| K200     | UBIQUITYLATI... | PSNVLINkEGHV...    | 0.000  | 0.000  | -0.793      | 0.100        |
| S218     | PHOSPHORYLAT... | ISGYLVDsVAKT...    | -0.245 | -0.004 | 0.000       | 0.000        |
| K243     | UBIQUITYLATI... | INPELNQkGYNV...    | -0.484 | 0.043  | -0.595      | -0.013       |

Previous Page 1 of 1 10 rows Next

B

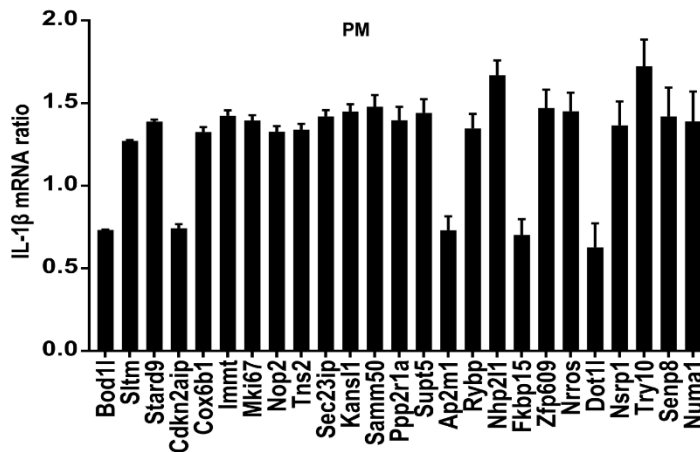

697 **Figure 8 New proteins involved in inflammatory responses**

698 (A) *Map2k3* served as an example of the PTM-inflammation website ([http://ptm-](http://ptm-inflammation.cn)  
699 [inflammation.cn](http://ptm-inflammation.cn)). The figure shows basic information about the protein, such as the  
700 sub-cellular location, modification type, UniProt description, sequence, etc. It also  
701 includes a visualization of post-translational data and a table providing detailed data.

702 (B) The results of the siRNA screen for proteins containing apparently regulated PTM  
703 sites in mouse “PM, peritoneal macrophage” cells. The ratio of the *IL-1 $\beta$*  mRNA was  
704 generated by comparing the effect of a certain siRNA with a negative control siRNA.  
705 Figures were based on data obtained from two biological replicates each containing  
706 three technical replicates, and error bars represent the standard error of the mean.

707

708 **Supplementary material**



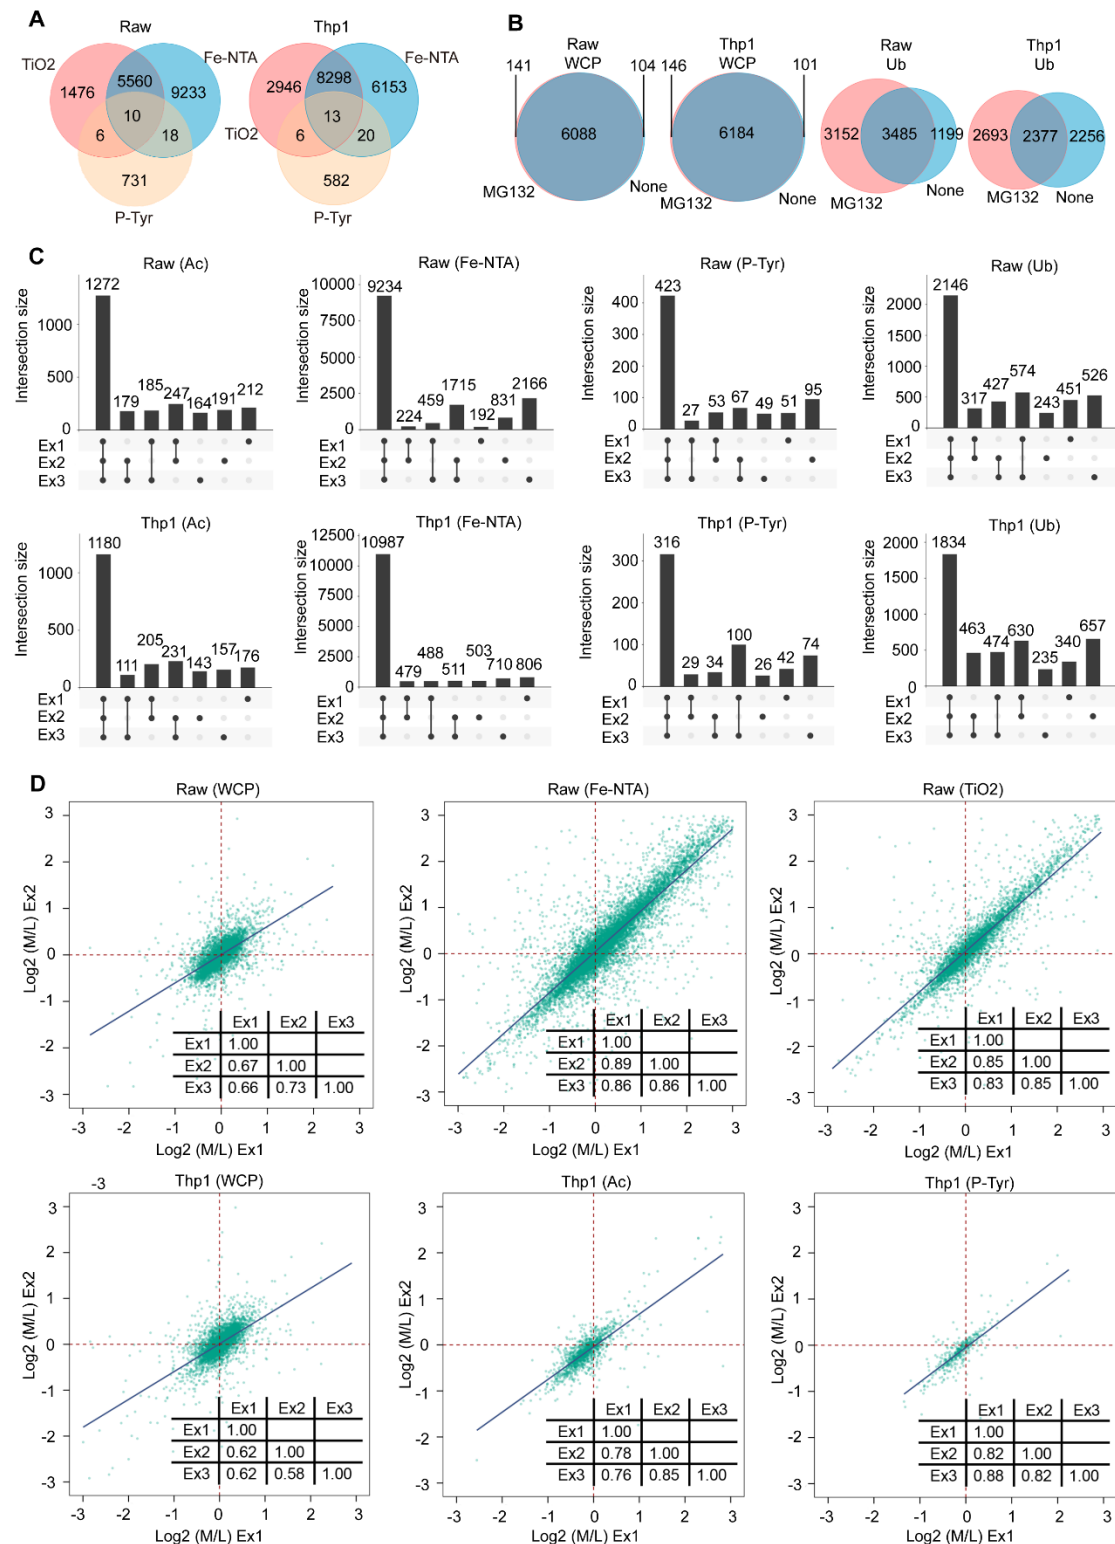

709

710

**Figure S1 Reproducible integrative proteomics analysis of LPS-stimulated macrophages**

711

(A) Intersection of phosphosites quantified with the three methods used to analyse the P.

712

(B) Overlap between proteins quantified in the WCP and diGly sites quantified in the Ub in “MG132, presence of MG132” and “None, absence of MG132” groups.

713

714

(C) Number of PTM sites that were quantified in each of 1, 2 or 3 Ac, Fe-NTA, P-Tyr

715

716

717 and Ub experiments in two cell types.

718 **(D)** Pearson's correlation plots for two "Ex, representative experiments" from WCP,  
 719 Fe-NTA, TiO<sub>2</sub>, Ac and P-Tyr in Raw and Thp1 cells. The inserted table shows Pearson's  
 720 correlation coefficients for all three biological duplicates.

721

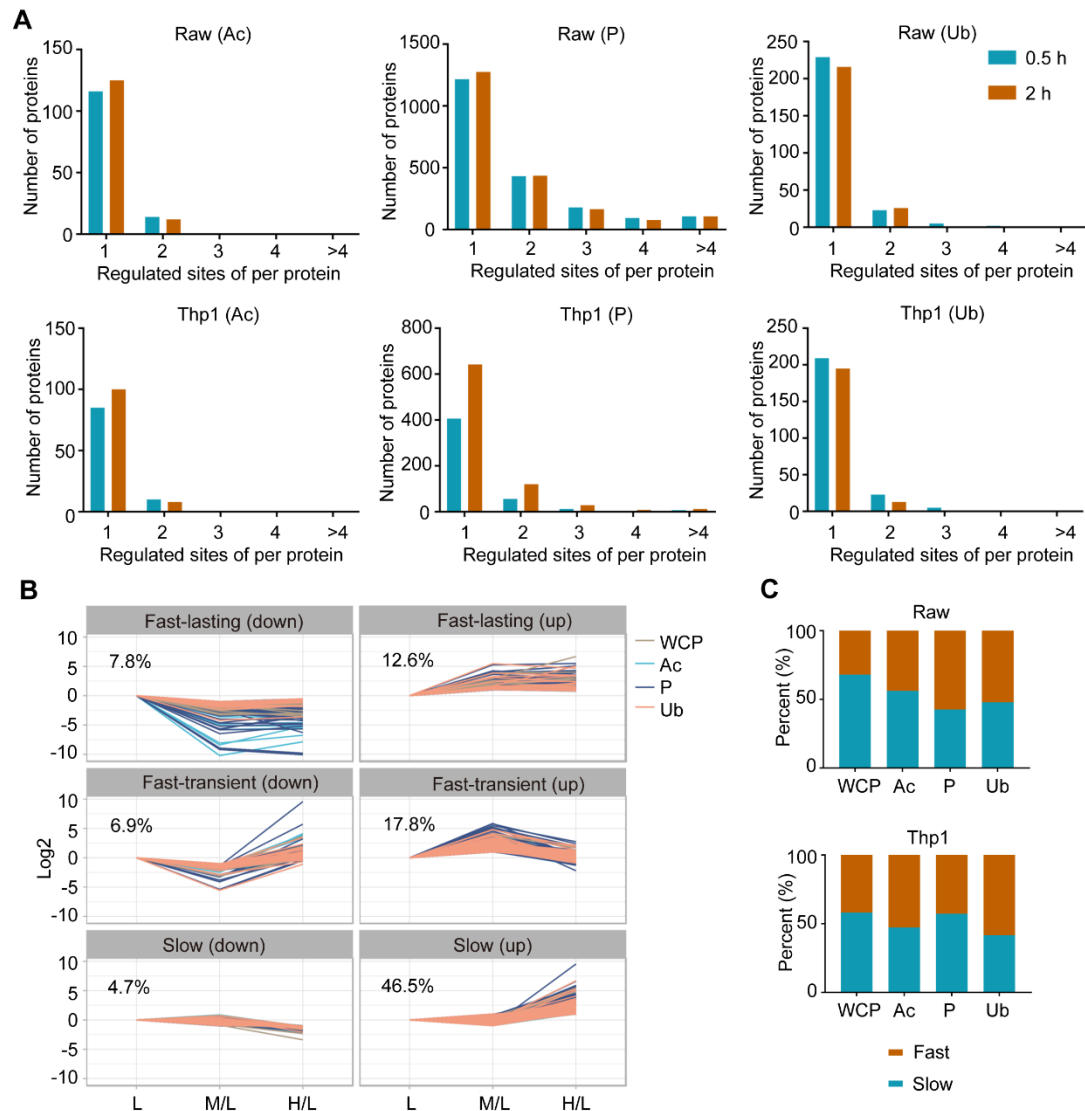

722

723 **Figure S2 Properties and differences among various types of proteomics**  
 724 **approaches**

725 **(A)** Distribution of regulated acetylated, phosphorylated and ubiquitinated sites per  
 726 protein in macrophages stimulated with LPS for 0.5 and 2 hours.

727 **(B)** Changes in integrative proteomics data obtained from LPS-treated Thp1 cells over  
 728 time. Regulated proteins and PTM sites were clustered into the six indicated categories  
 729 using the fuzzy c-means method.

730 **(C)** The distribution of categories of regulated sites in the corresponding proteins  
 731 identified using integrative proteomics. The six categories in B were combined into two  
 732 categories according to the speed of change.

733

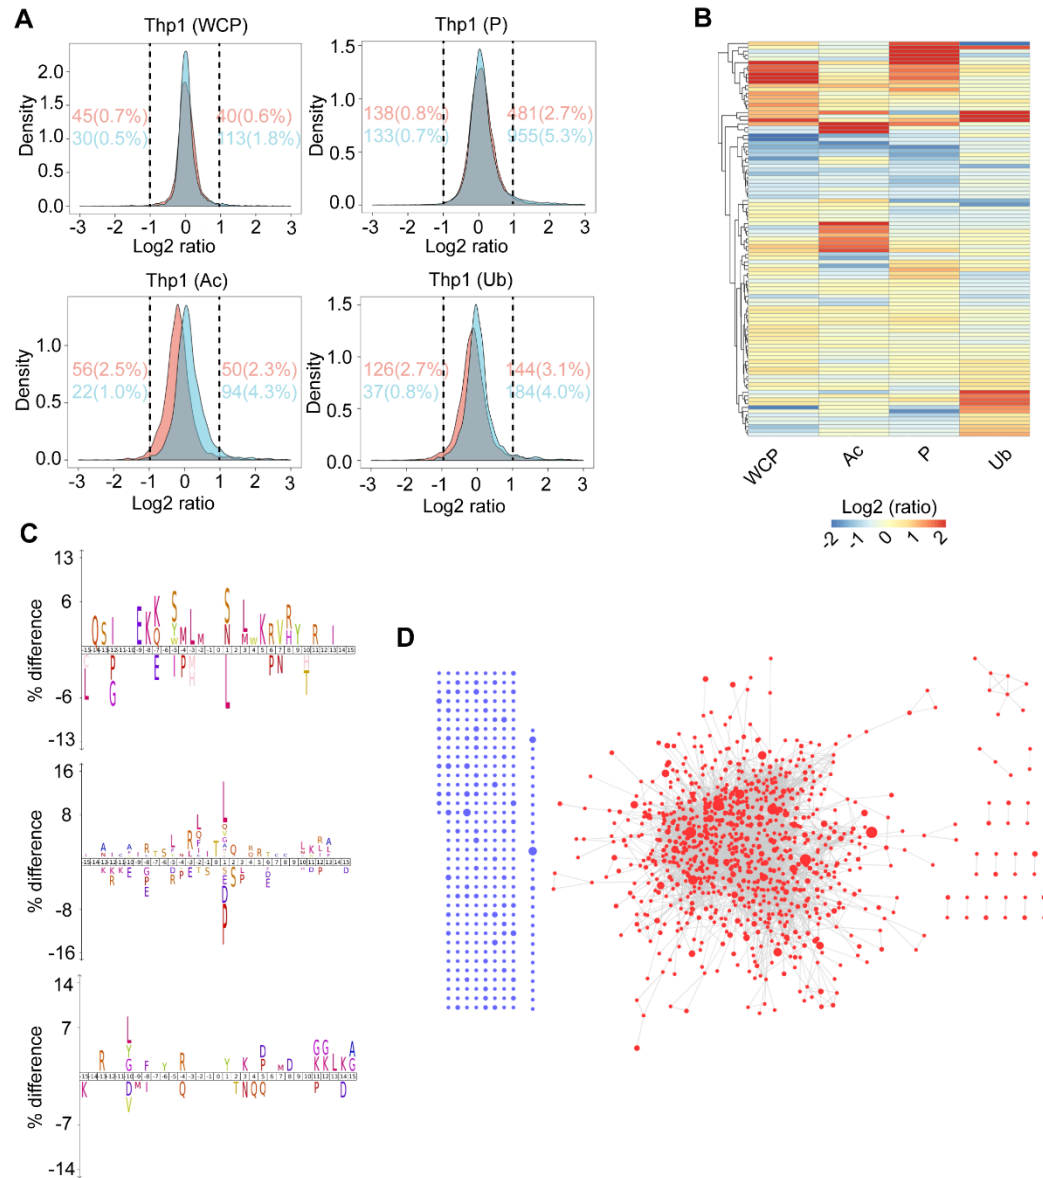

734

735 **Figure S3 PTM crosstalk between different proteins**

736 (A) Density gradient diagram of the Log<sub>2</sub> ratio of proteins and PTM sites in the different  
 737 proteomes of Thp1 cells. Carmine and cyan represent cells stimulated with LPS for 0.5  
 738 hours and 2 hours, respectively. Carmine and cyan numbers on the left and right  
 739 represent the number and percentage of regulated proteins and PTM sites in the two  
 740 time points, respectively.

741 (B) Heatmap representation of the Log<sub>2</sub> (M/L) of the abundance of proteins quantified  
 742 in Thp1 cells using the WCP and all PTM omics methods. Only proteins with a Log<sub>2</sub>  
 743 (M/L) value ≥ 1 or ≤ -1 are shown, and the colour of proteins identified using PTM  
 744 omics indicate the mean Log<sub>2</sub> (M/L) ratio of all PTM sites in the protein.

745 (C) The iceLogo plots show the difference of amino acid frequency at positions  
 746 flanking the PTM sites for LPS-regulated PTM sites compared to unregulated PTM  
 747 sites with a p value ≤ 0.05 in Thp1 cells.

748 (D) Interaction network for proteins with regulated PTM sites in Thp1 cells. Blue dots  
 749 indicate the proteins with no interacting partners, while red dots indicate the interacting

750 proteins. The size of the dot indicates the number of regulated PTM sites.

751

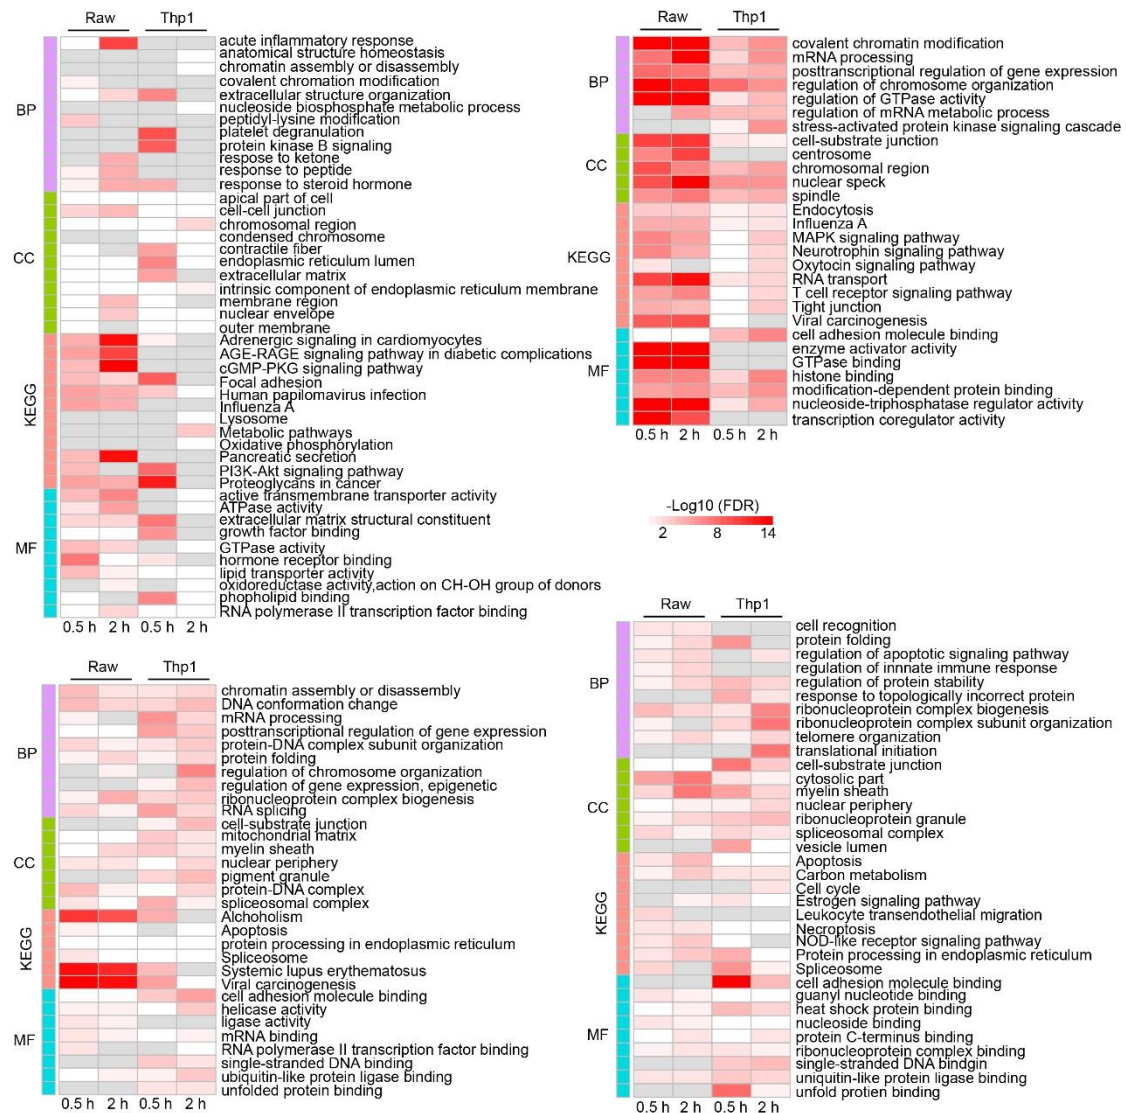

752

753 **Figure S4 Annotation enrichment analysis of regulated proteins**

754 Annotation enrichment analysis of proteins with regulated expression level (top left

755 panel), proteins with regulated acetylation sites (bottom left panel), proteins with

756 regulated phosphorylated sites (top right panel) and proteins with regulated

757 ubiquitinated sites (bottom right panel). Only the terms with the top three  $-\log_{10}(\text{FDR})$

758 values in each of the following categories for all time points and both cell lines are

759 shown: “BP, biological processes”, “CC, cellular compartments”, “KEGG, pathways”

760 and “MF, molecular functions”.

761

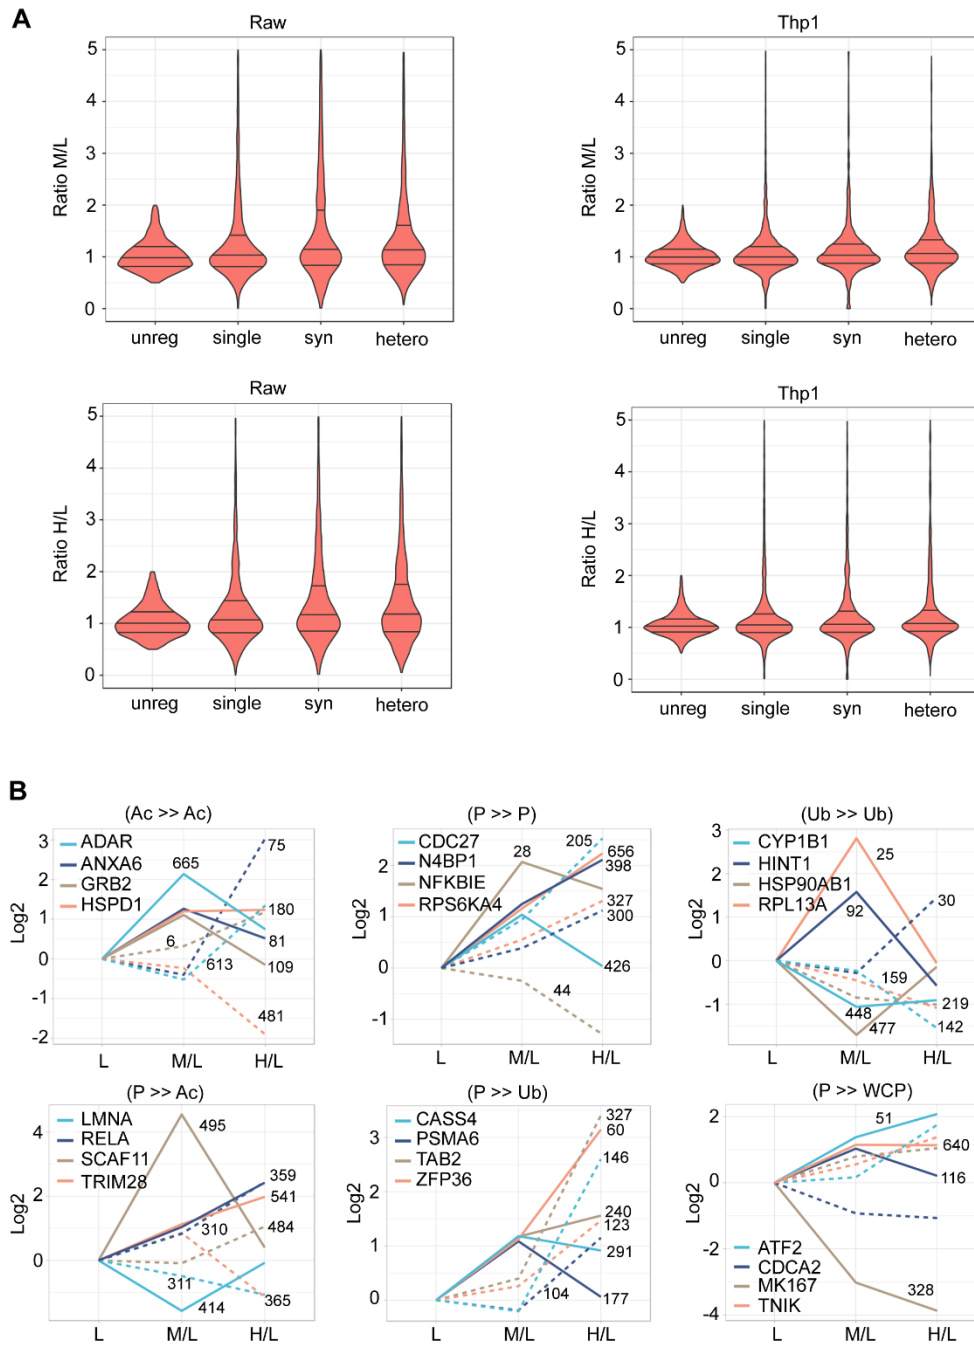

762

763 **Figure S5 PTM crosstalk between multiple sites on the same protein**

764 (A) Distribution of the ratio of all PTM sites identified in proteins in the unreg, single,  
 765 syn and hetero groups. The lower, median and upper lines in each violin plot correspond  
 766 to 25%, 50% and 75%, respectively.

767 (B) Selected regulated proteins in Thp1 cells belonging to the corresponding category  
 768 listed on top of each panel. The solid line represents a ‘fast’ regulated event and the  
 769 dotted line represents a ‘slow’ regulated event. The number next to the line represents  
 770 the site of PTM on the corresponding protein. The PTM in the left of “>>” is ‘slow’  
 771 PTM and The PTM in the right of “>>” is ‘fast’ PTM.

772

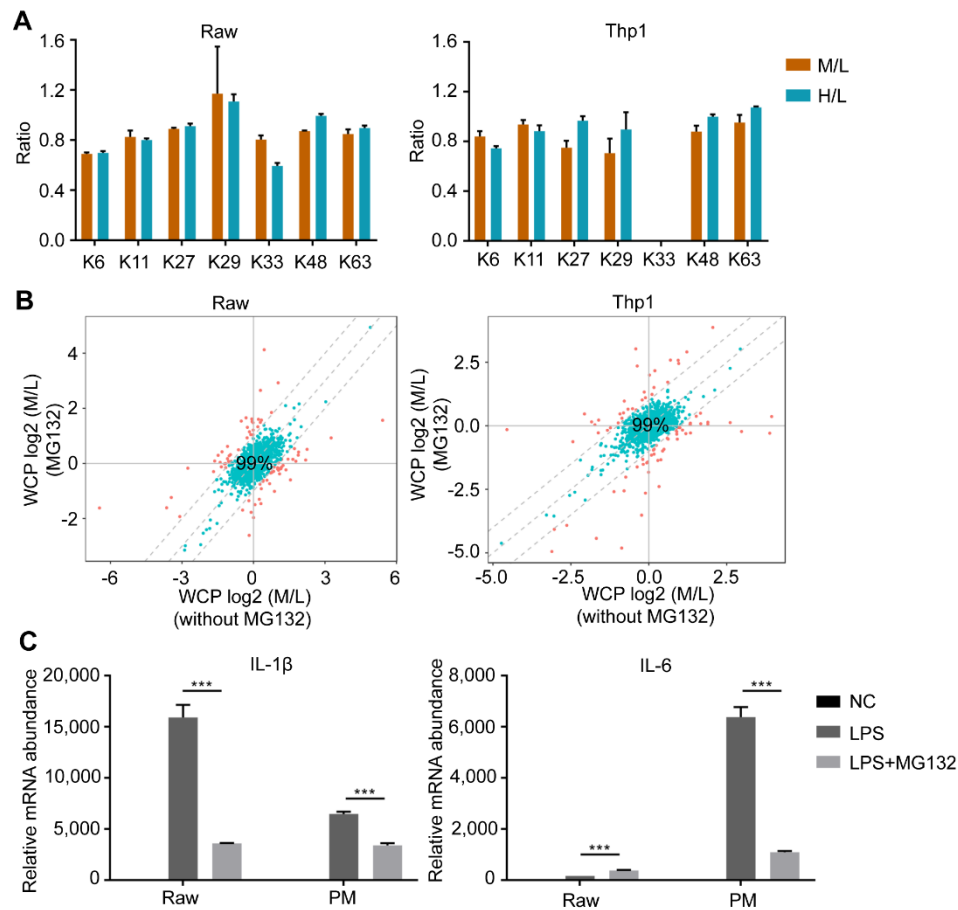

773

774

**Figure S6 Integrative proteomics reveals a prevalence of both degradative and non-degradative ubiquitylation**

775

776 (A) The ratio of the abundance of ubiquitin lysine sites quantified in the Ub of Raw and  
777 Thp1 cells following LPS stimulation with the presence of MG132.

778

779 (B) Comparison of Log<sub>2</sub> (M/L) values of proteins abundance in the WCP of LPS-  
780 stimulated cells treated with or without MG132 for 2 hours. Proteins that exhibited a  $\geq$   
781 1 Log<sub>2</sub> (M/L) difference in untreated and MG132-treated cells were considered  
782 dramatically affected by MG132 (carmine).

782

783 (C) The relative mRNA levels of *IL-1 $\beta$*  and *IL-6* were generated from the comparison  
784 of a certain group with the “NC, negative control”. One representative containing three  
785 technical replicates out of two independent experiments is shown. MG132 (2  $\mu$ M) and  
786 LPS were added at the same time.

786

787 Error bars represent the standard error of the mean and statistical significance was  
788 determined by t-test (\* $P \leq 0.05$ ; \*\* $P \leq 0.01$ ; \*\*\* $P \leq 0.001$ ).

788

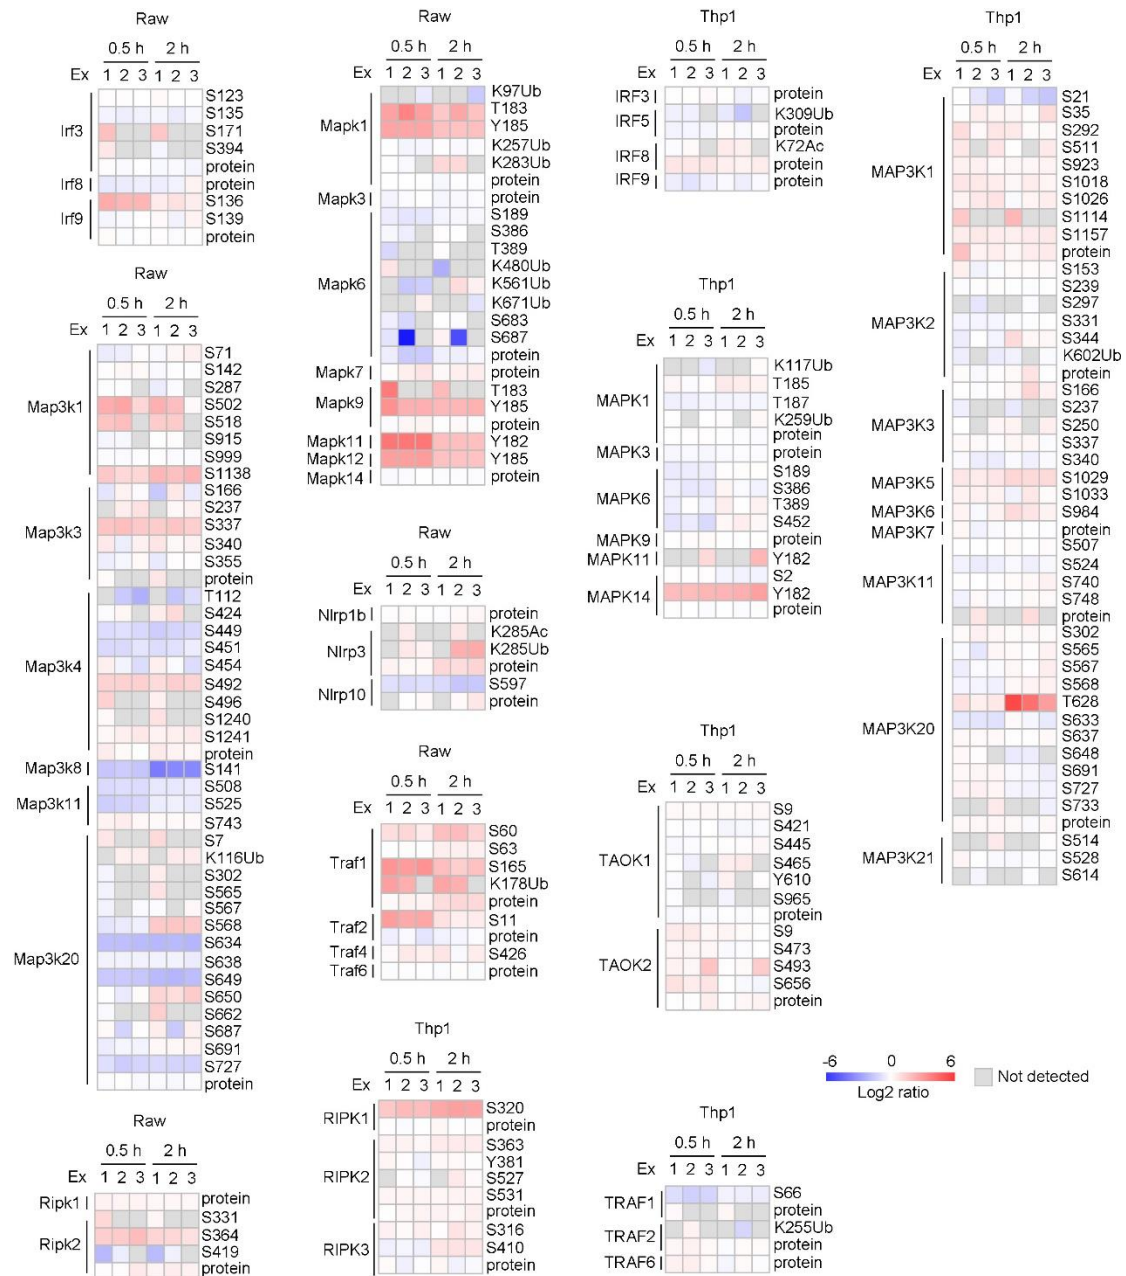

789

790 **Figure S7 Regulated proteins involved in inflammatory signalling pathways**  
 791 **after cells were stimulated with LPS**

792 The diagram shows the intensity of signals for proteins and PTM sites involved in  
 793 inflammatory signalling pathways identified in cells stimulated with LPS for 0.5 hours  
 794 and 2 hours.

795

796 **Table S1 WCP and PTM data of Raw and Thp1 cells**

797

798 **Table S2 Interacting proteins containing PTM crosstalk across proteins**

799

800 **Table S3 Time series analysis of PTM data**

801

802 **Table S4 siRNA screening results and siRNA sequences**

803

804 **Table S5 Conserved proteins between Raw and Thp1 cells**
